# Supplementary material
Source: MDPI journal article supplement (https://www.mdpi.com/2073-4433/12/12/1681)
Supplement: s1 [file s1]

## Supplemental Material

**Table S1**

Field measurements at the eight sites

| Observables                                 | Technique                    | Max Resolution | Detection Limit    |
|---------------------------------------------|------------------------------|----------------|--------------------|
| • Gases:                                    |                              |                | ppb                |
| NO                                          | CL                           | 1–min          | 0.05               |
| NO <sub>2</sub>                             | Photolysis/CL                | 1–min          | 0.1                |
| HNO <sub>3</sub>                            | Denuder/Mo reduction/CL      | 1–min          | 0.1                |
| NO <sub>y</sub>                             | Mo reduction/CL              | 1–min          | 0.1                |
| SO <sub>2</sub>                             | UV–fluorescence              | 1–min          | 0.2                |
| NH <sub>3</sub>                             | Denuder/Pt oxidation/CL      | 5–min          | 0.2                |
| • iPM <sub>2.5</sub> chemical compositions: |                              |                | µg m <sup>-3</sup> |
| SO <sub>4</sub> <sup>2-</sup>               | Fe reduction/UV–fluorescence | 5–min          | 0.4                |
| NO <sub>3</sub> <sup>-</sup>                | Filter/Mo reduction/CL       | 5–min          | 0.2                |
| NH <sub>4</sub> <sup>+</sup>                | Filter/Pt oxidation/CL       | 5–min          | 0.1                |
| • Meteorological conditions:                |                              |                |                    |
| T/RH/SR/BP                                  | Various                      | 1–min          | N/A                |
| WS/WD/Precipitation                         | Various                      | 1–min          | N/A                |

CL: chemiluminescence; SR: solar radiation; BP: barometric pressure; WS: wind speed; WD: wind direction; N/A: not applicable.

**Table S2**

The statistics of different precursor gases of iPM<sub>2.5</sub> by season at the YRK site in 2008-2011

| Season |        | Na <sup>+</sup> | TH <sub>2</sub> SO <sub>4</sub> | TNH <sub>3</sub> | THNO <sub>3</sub> | THCl | Ca <sup>2+</sup> | K <sup>+</sup> | Mg <sup>2+</sup> | RH   | T (K)  |
|--------|--------|-----------------|---------------------------------|------------------|-------------------|------|------------------|----------------|------------------|------|--------|
| Winter | min    | 0.00            | 0.63                            | 0.83             | 0.47              | 0.02 | 0.00             | 0.01           | 0.00             | 0.37 | 264.93 |
|        | median | 0.02            | 2.19                            | 1.84             | 1.99              | 0.04 | 0.02             | 0.02           | 0.00             | 0.61 | 277.18 |
|        | max    | 0.28            | 5.12                            | 5.00             | 8.01              | 0.21 | 0.15             | 0.11           | 0.03             | 0.91 | 290.62 |
|        | mean   | 0.05            | 2.22                            | 2.15             | 2.49              | 0.05 | 0.03             | 0.03           | 0.01             | 0.62 | 277.61 |
|        | SD     | 0.06            | 1.01                            | 1.05             | 1.50              | 0.05 | 0.03             | 0.03           | 0.01             | 0.14 | 5.70   |
|        | N      | 30              | 30                              | 30               | 30                | 30   | 30               | 30             | 30               | 30   | 30     |
| Spring | min    | 0.01            | 0.80                            | 0.87             | 0.23              | 0.01 | 0.01             | 0.01           | 0.00             | 0.35 | 272.68 |
|        | median | 0.03            | 3.36                            | 2.71             | 1.62              | 0.04 | 0.03             | 0.03           | 0.01             | 0.64 | 291.29 |
|        | max    | 0.47            | 12.09                           | 9.26             | 3.86              | 0.18 | 0.26             | 0.11           | 0.03             | 0.93 | 299.32 |
|        | mean   | 0.07            | 3.42                            | 2.91             | 1.68              | 0.04 | 0.06             | 0.04           | 0.01             | 0.64 | 289.45 |
|        | SD     | 0.09            | 2.04                            | 1.52             | 0.70              | 0.04 | 0.07             | 0.02           | 0.01             | 0.14 | 6.12   |
|        | N      | 34              | 34                              | 34               | 34                | 34   | 34               | 34             | 34               | 34   | 34     |
| Summer | min    | 0.00            | 1.57                            | 1.06             | 0.35              | 0.01 | 0.01             | 0.00           | 0.00             | 0.47 | 294.27 |
|        | median | 0.02            | 3.98                            | 2.87             | 1.34              | 0.03 | 0.03             | 0.02           | 0.01             | 0.71 | 298.60 |
|        | max    | 0.21            | 13.66                           | 7.81             | 3.82              | 0.13 | 0.06             | 0.35           | 0.07             | 0.96 | 301.90 |
|        | mean   | 0.04            | 4.51                            | 3.07             | 1.51              | 0.03 | 0.03             | 0.03           | 0.01             | 0.70 | 298.42 |
|        | SD     | 0.04            | 2.60                            | 1.27             | 0.64              | 0.02 | 0.01             | 0.05           | 0.01             | 0.11 | 1.82   |
|        | N      | 62              | 62                              | 62               | 62                | 62   | 62               | 62             | 62               | 62   | 62     |
| Fall   | min    | 0.00            | 0.71                            | 0.88             | 0.49              | 0.01 | 0.01             | 0.01           | 0.00             | 0.40 | 277.96 |
|        | median | 0.02            | 2.04                            | 1.67             | 1.25              | 0.03 | 0.02             | 0.02           | 0.00             | 0.62 | 290.19 |
|        | max    | 0.53            | 7.15                            | 8.31             | 3.17              | 0.20 | 0.08             | 0.07           | 0.03             | 1.00 | 299.58 |
|        | mean   | 0.04            | 2.37                            | 2.24             | 1.52              | 0.04 | 0.03             | 0.02           | 0.01             | 0.65 | 289.05 |
|        | SD     | 0.09            | 1.45                            | 1.40             | 0.75              | 0.04 | 0.02             | 0.01           | 0.01             | 0.14 | 5.39   |
|        | N      | 40              | 40                              | 40               | 40                | 40   | 40               | 40             | 40               | 40   | 40     |

<sup>1</sup> All the concentration values are expressed in µg m<sup>-3</sup>.

<sup>2</sup> TNH<sub>3</sub> = NH<sub>3</sub> + NH<sub>4</sub><sup>+</sup>; THNO<sub>3</sub> = HNO<sub>3</sub> + NO<sub>3</sub><sup>-</sup>; TH<sub>2</sub>SO<sub>4</sub> = SO<sub>4</sub><sup>2-</sup>; TNH<sub>3</sub>, THNO<sub>3</sub>, TH<sub>2</sub>SO<sub>4</sub> are all expressed as the equivalent concentration; T is temperature; RH is relative humidity; SD is standard deviation; N is the number of observations.

**Table S3**The statistics of different precursor gases of iPM<sub>2.5</sub> by season at the YRK site in 2012-2016

| Season |        | Na <sup>+</sup> | TH <sub>2</sub> SO <sub>4</sub> | TNH <sub>3</sub> | THNO <sub>3</sub> | THCl | Ca <sup>2+</sup> | K <sup>+</sup> | Mg <sup>2+</sup> | RH   | T (K)  |
|--------|--------|-----------------|---------------------------------|------------------|-------------------|------|------------------|----------------|------------------|------|--------|
| Winter | min    | 0.00            | 0.33                            | 0.74             | 0.61              | 0.01 | 0.00             | 0.01           | 0.00             | 0.31 | 265.13 |
|        | median | 0.01            | 1.31                            | 1.40             | 1.22              | 0.02 | 0.02             | 0.02           | 0.00             | 0.62 | 279.18 |
|        | max    | 0.35            | 3.78                            | 4.23             | 2.50              | 0.04 | 0.03             | 0.04           | 0.01             | 0.85 | 287.25 |
|        | mean   | 0.04            | 1.56                            | 1.53             | 1.41              | 0.02 | 0.01             | 0.02           | 0.00             | 0.61 | 278.22 |
|        | SD     | 0.07            | 0.97                            | 0.69             | 0.55              | 0.01 | 0.01             | 0.01           | 0.00             | 0.15 | 4.83   |
|        | N      | 27              | 27                              | 27               | 27                | 27   | 27               | 27             | 27               | 27   | 27     |
| Spring | min    | 0.00            | 0.59                            | 0.91             | 0.30              | 0.01 | 0.00             | 0.00           | 0.00             | 0.31 | 273.66 |
|        | median | 0.02            | 1.58                            | 2.06             | 1.13              | 0.02 | 0.02             | 0.02           | 0.01             | 0.66 | 291.94 |
|        | max    | 0.26            | 3.81                            | 4.55             | 2.15              | 0.10 | 0.06             | 0.05           | 0.02             | 0.88 | 299.26 |
|        | mean   | 0.05            | 1.82                            | 2.11             | 1.13              | 0.03 | 0.03             | 0.03           | 0.01             | 0.62 | 289.63 |
|        | SD     | 0.06            | 0.81                            | 0.89             | 0.47              | 0.02 | 0.01             | 0.02           | 0.01             | 0.14 | 6.42   |
|        | N      | 30              | 30                              | 30               | 30                | 30   | 30               | 30             | 30               | 30   | 30     |
| Summer | min    | 0.01            | 0.70                            | 1.10             | 0.39              | 0.01 | 0.00             | 0.00           | 0.00             | 0.44 | 290.01 |
|        | median | 0.02            | 1.93                            | 2.32             | 1.01              | 0.02 | 0.02             | 0.03           | 0.01             | 0.73 | 297.58 |
|        | max    | 0.20            | 4.15                            | 10.69            | 2.15              | 0.07 | 0.09             | 0.07           | 0.03             | 0.87 | 303.83 |
|        | mean   | 0.03            | 2.05                            | 2.66             | 1.11              | 0.03 | 0.03             | 0.03           | 0.01             | 0.71 | 297.56 |
|        | SD     | 0.04            | 0.92                            | 1.62             | 0.49              | 0.01 | 0.02             | 0.02           | 0.01             | 0.11 | 2.27   |
|        | N      | 37              | 37                              | 37               | 37                | 37   | 37               | 37             | 37               | 37   | 37     |
| Fall   | min    | 0.00            | 0.10                            | 0.24             | 0.16              | 0.01 | 0.01             | 0.00           | 0.00             | 0.44 | 273.19 |
|        | median | 0.02            | 1.29                            | 1.91             | 0.97              | 0.02 | 0.02             | 0.02           | 0.00             | 0.66 | 290.73 |
|        | max    | 0.64            | 3.11                            | 10.33            | 3.37              | 0.07 | 0.05             | 0.08           | 0.02             | 0.93 | 298.62 |
|        | mean   | 0.04            | 1.49                            | 2.45             | 1.10              | 0.02 | 0.02             | 0.03           | 0.00             | 0.68 | 289.40 |
|        | SD     | 0.10            | 0.76                            | 1.93             | 0.65              | 0.01 | 0.01             | 0.02           | 0.00             | 0.13 | 6.58   |
|        | N      | 39              | 39                              | 39               | 39                | 39   | 39               | 39             | 39               | 39   | 39     |

<sup>1</sup> All the concentration values are expressed in  $\mu\text{g m}^{-3}$ .<sup>2</sup> TNH<sub>3</sub> = NH<sub>3</sub> + NH<sub>4</sub><sup>+</sup>; THNO<sub>3</sub> = HNO<sub>3</sub> + NO<sub>3</sub><sup>-</sup>; TH<sub>2</sub>SO<sub>4</sub> = SO<sub>4</sub><sup>2-</sup>; TNH<sub>3</sub>, THNO<sub>3</sub>, TH<sub>2</sub>SO<sub>4</sub> are all expressed as the equivalent concentration; T is temperature; RH is relative humidity; SD is standard deviation; N is the number of observations.**Table S4**The statistics of different precursor gases of iPM<sub>2.5</sub> by season at the JST site in 2010-2011

| Season |        | Na <sup>+</sup> | TH <sub>2</sub> SO <sub>4</sub> | TNH <sub>3</sub> | THNO <sub>3</sub> | THCl | Ca <sup>2+</sup> | K <sup>+</sup> | Mg <sup>2+</sup> | RH   | T (K)  |
|--------|--------|-----------------|---------------------------------|------------------|-------------------|------|------------------|----------------|------------------|------|--------|
| Winter | min    | 0.00            | 1.09                            | 0.97             | 0.76              | 0.02 | 0.00             | 0.00           | 0.00             | 0.48 | 268.09 |
|        | median | 0.03            | 1.86                            | 1.82             | 1.29              | 0.03 | 0.03             | 0.02           | 0.00             | 0.61 | 276.09 |
|        | max    | 0.18            | 4.94                            | 4.01             | 6.50              | 0.19 | 0.05             | 0.08           | 0.02             | 0.97 | 289.73 |
|        | mean   | 0.04            | 2.26                            | 1.89             | 1.84              | 0.06 | 0.02             | 0.02           | 0.01             | 0.66 | 276.74 |
|        | SD     | 0.05            | 1.06                            | 0.70             | 1.40              | 0.05 | 0.01             | 0.02           | 0.00             | 0.15 | 5.98   |
|        | N      | 17              | 17                              | 17               | 17                | 17   | 17               | 17             | 17               | 17   | 17     |
| Spring | min    | 0.01            | 1.00                            | 1.50             | 0.87              | 0.01 | 0.01             | 0.01           | 0.00             | 0.39 | 275.99 |
|        | median | 0.05            | 2.98                            | 2.34             | 2.24              | 0.03 | 0.02             | 0.02           | 0.01             | 0.61 | 293.16 |
|        | max    | 0.14            | 7.65                            | 3.89             | 3.72              | 0.15 | 0.03             | 0.11           | 0.02             | 0.80 | 300.87 |
|        | mean   | 0.06            | 3.30                            | 2.44             | 2.14              | 0.04 | 0.02             | 0.04           | 0.01             | 0.61 | 289.56 |
|        | SD     | 0.05            | 1.62                            | 0.69             | 0.84              | 0.03 | 0.01             | 0.03           | 0.00             | 0.09 | 7.17   |
|        | N      | 19              | 19                              | 19               | 19                | 19   | 19               | 19             | 19               | 19   | 19     |
| Summer | min    | 0.01            | 1.98                            | 1.70             | 1.58              | 0.02 | 0.01             | 0.01           | 0.00             | 0.55 | 297.73 |
|        | median | 0.02            | 3.77                            | 2.60             | 2.25              | 0.03 | 0.03             | 0.03           | 0.01             | 0.64 | 300.86 |
|        | max    | 0.09            | 5.88                            | 3.78             | 3.40              | 0.04 | 0.06             | 0.10           | 0.02             | 0.75 | 302.93 |
|        | mean   | 0.03            | 4.01                            | 2.59             | 2.28              | 0.03 | 0.03             | 0.03           | 0.01             | 0.65 | 300.80 |
|        | SD     | 0.02            | 1.35                            | 0.57             | 0.65              | 0.01 | 0.01             | 0.03           | 0.01             | 0.07 | 1.29   |
|        | N      | 17              | 17                              | 17               | 17                | 17   | 17               | 17             | 17               | 17   | 17     |
| Fall   | min    | 0.01            | 0.88                            | 1.18             | 0.66              | 0.02 | 0.01             | 0.01           | 0.00             | 0.47 | 283.32 |
|        | median | 0.02            | 2.04                            | 2.18             | 1.14              | 0.03 | 0.03             | 0.03           | 0.01             | 0.54 | 292.56 |
|        | max    | 0.05            | 4.48                            | 3.92             | 2.77              | 0.05 | 0.05             | 0.11           | 0.01             | 0.70 | 300.74 |
|        | mean   | 0.02            | 2.15                            | 2.31             | 1.42              | 0.03 | 0.03             | 0.04           | 0.01             | 0.55 | 292.20 |
|        | SD     | 0.01            | 1.09                            | 0.78             | 0.70              | 0.01 | 0.01             | 0.03           | 0.00             | 0.07 | 5.83   |
|        | N      | 14              | 14                              | 14               | 14                | 14   | 14               | 14             | 14               | 14   | 14     |

<sup>1</sup> All the concentration values are expressed in  $\mu\text{g m}^{-3}$ .<sup>2</sup> TNH<sub>3</sub> = NH<sub>3</sub> + NH<sub>4</sub><sup>+</sup>; THNO<sub>3</sub> = HNO<sub>3</sub> + NO<sub>3</sub><sup>-</sup>; TH<sub>2</sub>SO<sub>4</sub> = SO<sub>4</sub><sup>2-</sup>; TNH<sub>3</sub>, THNO<sub>3</sub>, TH<sub>2</sub>SO<sub>4</sub> are all expressed as the equivalent concentration; T is temperature; RH is relative humidity; SD is standard deviation; N is the number of observations.

**Table S5**The statistics of different precursor gases of iPM<sub>2.5</sub> by season at the JST site in 2012-2016

| Season |        | Na <sup>+</sup> | TH <sub>2</sub> SO <sub>4</sub> | TNH <sub>3</sub> | THNO <sub>3</sub> | THCl | Ca <sup>2+</sup> | K <sup>+</sup> | Mg <sup>2+</sup> | RH   | T (K)  |
|--------|--------|-----------------|---------------------------------|------------------|-------------------|------|------------------|----------------|------------------|------|--------|
| Winter | min    | 0.01            | 0.57                            | 0.95             | 0.58              | 0.02 | 0.01             | 0.01           | 0.00             | 0.37 | 271.33 |
|        | median | 0.02            | 1.32                            | 1.54             | 1.45              | 0.03 | 0.02             | 0.02           | 0.00             | 0.52 | 278.25 |
|        | max    | 0.13            | 3.38                            | 2.85             | 3.92              | 0.39 | 0.05             | 0.07           | 0.02             | 0.95 | 290.89 |
|        | mean   | 0.04            | 1.65                            | 1.69             | 1.73              | 0.07 | 0.02             | 0.03           | 0.01             | 0.58 | 279.74 |
|        | SD     | 0.03            | 0.85                            | 0.58             | 0.96              | 0.09 | 0.01             | 0.02           | 0.00             | 0.18 | 5.37   |
|        | N      | 17              | 17                              | 17               | 17                | 17   | 17               | 17             | 17               | 17   | 17     |
| Spring | min    | 0.00            | 0.54                            | 0.82             | 0.37              | 0.01 | 0.01             | 0.01           | 0.00             | 0.29 | 275.26 |
|        | median | 0.03            | 1.67                            | 1.96             | 1.08              | 0.02 | 0.02             | 0.03           | 0.01             | 0.57 | 290.19 |
|        | max    | 0.18            | 3.21                            | 3.25             | 2.27              | 0.15 | 0.06             | 0.06           | 0.02             | 0.75 | 299.37 |
|        | mean   | 0.05            | 1.72                            | 1.84             | 1.16              | 0.03 | 0.03             | 0.03           | 0.01             | 0.56 | 290.31 |
|        | SD     | 0.05            | 0.67                            | 0.61             | 0.53              | 0.03 | 0.01             | 0.02           | 0.01             | 0.12 | 6.47   |
|        | N      | 29              | 29                              | 29               | 29                | 29   | 29               | 29             | 29               | 29   | 29     |
| Summer | min    | 0.01            | 0.69                            | 0.86             | 0.73              | 0.01 | 0.01             | 0.01           | 0.00             | 0.42 | 296.19 |
|        | median | 0.02            | 1.77                            | 1.92             | 1.53              | 0.02 | 0.02             | 0.03           | 0.01             | 0.63 | 298.97 |
|        | max    | 0.11            | 3.99                            | 2.87             | 3.71              | 0.05 | 0.07             | 0.23           | 0.02             | 0.85 | 305.40 |
|        | mean   | 0.03            | 2.02                            | 1.96             | 1.70              | 0.02 | 0.03             | 0.05           | 0.01             | 0.63 | 299.53 |
|        | SD     | 0.02            | 0.94                            | 0.58             | 0.67              | 0.01 | 0.01             | 0.05           | 0.01             | 0.10 | 2.27   |
|        | N      | 35              | 35                              | 35               | 35                | 35   | 35               | 35             | 35               | 35   | 35     |
| Fall   | min    | 0.00            | 0.41                            | 1.02             | 0.34              | 0.01 | 0.01             | 0.00           | 0.00             | 0.41 | 276.27 |
|        | median | 0.02            | 1.30                            | 1.86             | 1.00              | 0.02 | 0.03             | 0.03           | 0.01             | 0.63 | 293.00 |
|        | max    | 0.12            | 3.33                            | 3.12             | 2.33              | 0.06 | 0.07             | 0.07           | 0.02             | 0.77 | 300.46 |
|        | mean   | 0.03            | 1.45                            | 1.96             | 1.16              | 0.02 | 0.03             | 0.03           | 0.01             | 0.61 | 291.56 |
|        | SD     | 0.03            | 0.76                            | 0.53             | 0.50              | 0.01 | 0.02             | 0.02           | 0.00             | 0.10 | 6.26   |
|        | N      | 36              | 36                              | 36               | 36                | 36   | 36               | 36             | 36               | 36   | 36     |

<sup>1</sup> All the concentration values are expressed in µg m<sup>-3</sup>.<sup>2</sup> TNH<sub>3</sub> = NH<sub>3</sub> + NH<sub>4</sub><sup>+</sup>; THNO<sub>3</sub> = HNO<sub>3</sub> + NO<sub>3</sub><sup>-</sup>; TH<sub>2</sub>SO<sub>4</sub> = SO<sub>4</sub><sup>2-</sup>; TNH<sub>3</sub>, THNO<sub>3</sub>, TH<sub>2</sub>SO<sub>4</sub> are all expressed as the equivalent concentration; T is temperature; RH is relative humidity; SD is standard deviation; N is the number of observations.**Table S6**The statistics of different precursor gases of iPM<sub>2.5</sub> by season at the CTR site in 2012-2016

| Season |        | Na <sup>+</sup> | TH <sub>2</sub> SO <sub>4</sub> | TNH <sub>3</sub> | THNO <sub>3</sub> | THCl | Ca <sup>2+</sup> | K <sup>+</sup> | Mg <sup>2+</sup> | RH   | T (K)  |
|--------|--------|-----------------|---------------------------------|------------------|-------------------|------|------------------|----------------|------------------|------|--------|
| Winter | min    | 0.01            | 0.36                            | 0.21             | 0.19              | 0.01 | 0.01             | 0.00           | 0.00             | 0.37 | 271.98 |
|        | median | 0.02            | 0.97                            | 0.59             | 0.70              | 0.02 | 0.02             | 0.03           | 0.00             | 0.60 | 280.59 |
|        | max    | 0.42            | 4.40                            | 1.48             | 2.22              | 0.09 | 0.06             | 0.08           | 0.02             | 0.94 | 290.03 |
|        | mean   | 0.05            | 1.41                            | 0.65             | 0.99              | 0.02 | 0.02             | 0.03           | 0.01             | 0.61 | 279.95 |
|        | SD     | 0.08            | 1.02                            | 0.32             | 0.61              | 0.02 | 0.01             | 0.02           | 0.00             | 0.15 | 4.47   |
|        | N      | 31              | 31                              | 31               | 31                | 31   | 31               | 31             | 31               | 31   | 31     |
| Spring | min    | 0.00            | 0.69                            | 0.47             | 0.22              | 0.01 | 0.01             | 0.01           | 0.00             | 0.35 | 280.90 |
|        | median | 0.02            | 1.69                            | 0.84             | 0.66              | 0.02 | 0.02             | 0.04           | 0.01             | 0.58 | 291.83 |
|        | max    | 0.19            | 4.48                            | 1.59             | 1.25              | 0.13 | 0.06             | 0.10           | 0.02             | 0.89 | 299.51 |
|        | mean   | 0.05            | 1.82                            | 0.91             | 0.67              | 0.03 | 0.03             | 0.04           | 0.01             | 0.60 | 291.70 |
|        | SD     | 0.05            | 0.83                            | 0.27             | 0.24              | 0.03 | 0.02             | 0.02           | 0.01             | 0.16 | 4.71   |
|        | N      | 34              | 34                              | 34               | 34                | 34   | 34               | 34             | 34               | 34   | 34     |
| Summer | min    | 0.00            | 0.69                            | 0.24             | 0.29              | 0.01 | 0.00             | 0.01           | 0.00             | 0.51 | 296.19 |
|        | median | 0.03            | 1.77                            | 0.79             | 0.69              | 0.02 | 0.03             | 0.03           | 0.01             | 0.73 | 299.43 |
|        | max    | 0.19            | 3.95                            | 1.48             | 1.60              | 0.58 | 0.21             | 0.08           | 0.05             | 0.87 | 303.32 |
|        | mean   | 0.04            | 1.93                            | 0.82             | 0.70              | 0.04 | 0.04             | 0.04           | 0.01             | 0.72 | 299.62 |
|        | SD     | 0.04            | 0.77                            | 0.31             | 0.28              | 0.08 | 0.04             | 0.02           | 0.01             | 0.09 | 1.56   |
|        | N      | 47              | 47                              | 47               | 47                | 47   | 47               | 47             | 47               | 47   | 47     |
| Fall   | min    | 0.00            | 0.28                            | 0.19             | 0.17              | 0.01 | 0.01             | 0.00           | 0.00             | 0.35 | 276.48 |
|        | median | 0.02            | 1.26                            | 0.71             | 0.72              | 0.02 | 0.03             | 0.03           | 0.01             | 0.67 | 292.91 |
|        | max    | 0.19            | 4.40                            | 1.44             | 1.79              | 0.09 | 0.09             | 0.14           | 0.03             | 0.95 | 301.75 |
|        | mean   | 0.04            | 1.38                            | 0.72             | 0.71              | 0.02 | 0.03             | 0.04           | 0.01             | 0.66 | 291.33 |
|        | SD     | 0.04            | 0.81                            | 0.26             | 0.32              | 0.01 | 0.02             | 0.03           | 0.01             | 0.13 | 6.52   |
|        | N      | 62              | 62                              | 62               | 62                | 62   | 62               | 62             | 62               | 62   | 62     |

<sup>1</sup> All the concentration values are expressed in µg m<sup>-3</sup>.<sup>2</sup> TNH<sub>3</sub> = NH<sub>3</sub> + NH<sub>4</sub><sup>+</sup>; THNO<sub>3</sub> = HNO<sub>3</sub> + NO<sub>3</sub><sup>-</sup>; TH<sub>2</sub>SO<sub>4</sub> = SO<sub>4</sub><sup>2-</sup>; TNH<sub>3</sub>, THNO<sub>3</sub>, TH<sub>2</sub>SO<sub>4</sub> are all expressed as the equivalent concentration; T is temperature; RH is relative humidity; SD is standard deviation; N is the number of observations.

**Table S7**The statistics of different precursor gases of iPM<sub>2.5</sub> by season at the BHM site in 2011

| Season |        | Na <sup>+</sup> | TH <sub>2</sub> SO <sub>4</sub> | TNH <sub>3</sub> | THNO <sub>3</sub> | THCl | Ca <sup>2+</sup> | K <sup>+</sup> | Mg <sup>2+</sup> | RH   | T (K)  |
|--------|--------|-----------------|---------------------------------|------------------|-------------------|------|------------------|----------------|------------------|------|--------|
| Winter | min    | 0.00            | 1.63                            | 1.33             | 0.91              | 0.01 | 0.01             | 0.01           | 0.00             | 0.53 | 272.70 |
|        | median | 0.04            | 2.47                            | 3.21             | 2.31              | 0.33 | 0.05             | 0.05           | 0.01             | 0.61 | 279.40 |
|        | max    | 0.40            | 3.42                            | 3.97             | 4.36              | 0.56 | 0.12             | 0.11           | 0.03             | 0.91 | 288.52 |
|        | mean   | 0.11            | 2.43                            | 2.65             | 2.30              | 0.26 | 0.05             | 0.05           | 0.01             | 0.65 | 279.60 |
|        | SD     | 0.14            | 0.66                            | 1.07             | 0.98              | 0.23 | 0.05             | 0.03           | 0.01             | 0.13 | 5.61   |
|        | N      | 9               | 9                               | 9                | 9                 | 9    | 9                | 9              | 9                | 9    | 9      |
| Spring | min    | 0.01            | 1.35                            | 1.61             | 0.94              | 0.02 | 0.02             | 0.02           | 0.00             | 0.45 | 288.03 |
|        | median | 0.02            | 3.68                            | 2.41             | 1.83              | 0.11 | 0.06             | 0.03           | 0.01             | 0.59 | 294.88 |
|        | max    | 0.22            | 5.38                            | 5.20             | 2.60              | 0.50 | 0.08             | 0.15           | 0.03             | 0.72 | 301.94 |
|        | mean   | 0.08            | 3.55                            | 2.77             | 1.80              | 0.15 | 0.05             | 0.06           | 0.02             | 0.58 | 295.16 |
|        | SD     | 0.09            | 1.64                            | 1.16             | 0.65              | 0.15 | 0.02             | 0.05           | 0.01             | 0.08 | 4.78   |
|        | N      | 9               | 9                               | 9                | 9                 | 9    | 9                | 9              | 9                | 9    | 9      |
| Summer | min    | 0.01            | 2.07                            | 1.85             | 1.20              | 0.04 | 0.02             | 0.01           | 0.00             | 0.52 | 298.14 |
|        | median | 0.03            | 4.05                            | 3.23             | 1.95              | 0.08 | 0.04             | 0.05           | 0.01             | 0.70 | 301.47 |
|        | max    | 0.55            | 5.88                            | 4.55             | 2.78              | 0.17 | 0.06             | 0.14           | 0.02             | 0.77 | 303.04 |
|        | mean   | 0.11            | 3.96                            | 3.12             | 2.01              | 0.09 | 0.04             | 0.06           | 0.01             | 0.67 | 301.02 |
|        | SD     | 0.17            | 1.20                            | 1.05             | 0.49              | 0.04 | 0.01             | 0.04           | 0.01             | 0.09 | 1.69   |
|        | N      | 9               | 9                               | 9                | 9                 | 9    | 9                | 9              | 9                | 9    | 9      |
| Fall   | min    | 0.00            | 1.65                            | 1.43             | 0.72              | 0.03 | 0.02             | 0.01           | 0.00             | 0.46 | 285.59 |
|        | median | 0.02            | 2.45                            | 2.44             | 1.25              | 0.12 | 0.04             | 0.02           | 0.02             | 0.74 | 287.77 |
|        | max    | 0.13            | 4.49                            | 2.89             | 1.93              | 0.16 | 0.16             | 0.13           | 0.03             | 0.87 | 291.71 |
|        | mean   | 0.05            | 2.77                            | 2.29             | 1.31              | 0.11 | 0.06             | 0.04           | 0.02             | 0.70 | 288.42 |
|        | SD     | 0.05            | 1.08                            | 0.61             | 0.59              | 0.05 | 0.06             | 0.05           | 0.01             | 0.16 | 3.00   |
|        | N      | 5               | 5                               | 5                | 5                 | 5    | 5                | 5              | 5                | 5    | 5      |

<sup>1</sup> All the concentration values are expressed in µg m<sup>-3</sup>.<sup>2</sup> TNH<sub>3</sub> = NH<sub>3</sub> + NH<sub>4</sub><sup>+</sup>; THNO<sub>3</sub> = HNO<sub>3</sub> + NO<sub>3</sub><sup>-</sup>; TH<sub>2</sub>SO<sub>4</sub> = SO<sub>4</sub><sup>2-</sup>; TNH<sub>3</sub>, THNO<sub>3</sub>, TH<sub>2</sub>SO<sub>4</sub> are all expressed as the equivalent concentration; T is temperature; RH is relative humidity; SD is standard deviation; N is the number of observations.**Table S8**The statistics of different precursor gases of iPM<sub>2.5</sub> by season at the BHM site in 2012-2016

| Season |        | Na <sup>+</sup> | TH <sub>2</sub> SO <sub>4</sub> | TNH <sub>3</sub> | THNO <sub>3</sub> | THCl | Ca <sup>2+</sup> | K <sup>+</sup> | Mg <sup>2+</sup> | RH   | T (K)  |
|--------|--------|-----------------|---------------------------------|------------------|-------------------|------|------------------|----------------|------------------|------|--------|
| Winter | min    | 0.01            | 0.61                            | 1.35             | 0.92              | 0.03 | 0.01             | 0.01           | 0.00             | 0.44 | 274.65 |
|        | median | 0.02            | 1.26                            | 1.61             | 1.27              | 0.10 | 0.02             | 0.02           | 0.01             | 0.62 | 281.76 |
|        | max    | 0.08            | 4.57                            | 2.96             | 4.07              | 0.53 | 0.05             | 0.07           | 0.02             | 0.91 | 290.62 |
|        | mean   | 0.03            | 1.92                            | 1.79             | 1.60              | 0.15 | 0.03             | 0.03           | 0.01             | 0.61 | 282.85 |
|        | SD     | 0.03            | 1.28                            | 0.52             | 0.92              | 0.14 | 0.01             | 0.02           | 0.00             | 0.13 | 4.19   |
|        | N      | 11              | 11                              | 11               | 11                | 11   | 11               | 11             | 11               | 11   | 11     |
| Spring | min    | 0.01            | 1.05                            | 1.20             | 0.55              | 0.02 | 0.01             | 0.01           | 0.00             | 0.44 | 282.14 |
|        | median | 0.06            | 1.76                            | 1.95             | 1.15              | 0.10 | 0.04             | 0.04           | 0.02             | 0.65 | 294.59 |
|        | max    | 0.18            | 3.95                            | 3.19             | 2.13              | 0.52 | 0.18             | 0.07           | 0.03             | 0.88 | 298.40 |
|        | mean   | 0.07            | 2.00                            | 2.01             | 1.22              | 0.14 | 0.05             | 0.04           | 0.02             | 0.63 | 292.62 |
|        | SD     | 0.05            | 0.89                            | 0.61             | 0.46              | 0.13 | 0.05             | 0.02           | 0.01             | 0.13 | 5.09   |
|        | N      | 13              | 13                              | 13               | 13                | 13   | 13               | 13             | 13               | 13   | 13     |
| Summer | min    | 0.00            | 0.59                            | 0.66             | 0.34              | 0.01 | 0.01             | 0.00           | 0.00             | 0.42 | 293.39 |
|        | median | 0.03            | 2.26                            | 2.17             | 1.20              | 0.04 | 0.03             | 0.04           | 0.01             | 0.63 | 299.67 |
|        | max    | 0.11            | 4.62                            | 3.65             | 2.35              | 0.08 | 0.17             | 0.17           | 0.04             | 0.88 | 303.38 |
|        | mean   | 0.04            | 2.41                            | 2.09             | 1.23              | 0.04 | 0.05             | 0.04           | 0.02             | 0.67 | 299.72 |
|        | SD     | 0.03            | 1.16                            | 0.79             | 0.48              | 0.02 | 0.04             | 0.04           | 0.01             | 0.11 | 2.85   |
|        | N      | 25              | 25                              | 25               | 25                | 25   | 25               | 25             | 25               | 25   | 25     |
| Fall   | min    | 0.01            | 0.40                            | 0.83             | 0.44              | 0.02 | 0.03             | 0.02           | 0.00             | 0.42 | 280.01 |
|        | median | 0.03            | 1.35                            | 1.90             | 0.96              | 0.08 | 0.04             | 0.04           | 0.01             | 0.67 | 295.22 |
|        | max    | 0.15            | 4.63                            | 4.27             | 2.10              | 0.64 | 0.15             | 0.10           | 0.07             | 0.73 | 301.70 |
|        | mean   | 0.05            | 1.98                            | 2.17             | 1.02              | 0.13 | 0.05             | 0.05           | 0.02             | 0.63 | 293.08 |
|        | SD     | 0.04            | 1.27                            | 0.97             | 0.39              | 0.16 | 0.03             | 0.02           | 0.01             | 0.10 | 6.58   |
|        | N      | 20              | 20                              | 20               | 20                | 20   | 20               | 20             | 20               | 20   | 20     |

<sup>1</sup> All the concentration values are expressed in µg m<sup>-3</sup>.<sup>2</sup> TNH<sub>3</sub> = NH<sub>3</sub> + NH<sub>4</sub><sup>+</sup>; THNO<sub>3</sub> = HNO<sub>3</sub> + NO<sub>3</sub><sup>-</sup>; TH<sub>2</sub>SO<sub>4</sub> = SO<sub>4</sub><sup>2-</sup>; TNH<sub>3</sub>, THNO<sub>3</sub>, TH<sub>2</sub>SO<sub>4</sub> are all expressed as the equivalent concentration; T is temperature; RH is relative humidity; SD is standard deviation; N is the number of observations.



**Table S9**The statistics of different precursor gases of iPM<sub>2.5</sub> by season at the OAK site in 2010

| Season |        | Na <sup>+</sup> | TH <sub>2</sub> SO <sub>4</sub> | TNH <sub>3</sub> | THNO <sub>3</sub> | THCl | Ca <sup>2+</sup> | K <sup>+</sup> | Mg <sup>2+</sup> | RH   | T (K)  |
|--------|--------|-----------------|---------------------------------|------------------|-------------------|------|------------------|----------------|------------------|------|--------|
| Winter | min    | 0.01            | 0.56                            | 0.42             | 0.27              | 0.02 | 0.01             | 0.00           | 0.00             | 0.33 | 270.37 |
|        | median | 0.03            | 1.42                            | 0.73             | 1.05              | 0.03 | 0.03             | 0.02           | 0.01             | 0.61 | 277.08 |
|        | max    | 0.13            | 4.84                            | 2.05             | 1.91              | 0.08 | 0.03             | 0.10           | 0.02             | 0.85 | 290.14 |
|        | mean   | 0.04            | 1.85                            | 0.87             | 1.05              | 0.04 | 0.02             | 0.04           | 0.01             | 0.63 | 279.03 |
|        | SD     | 0.04            | 1.28                            | 0.44             | 0.44              | 0.02 | 0.00             | 0.03           | 0.01             | 0.16 | 5.83   |
|        | N      | 13              | 13                              | 13               | 13                | 13   | 13               | 13             | 13               | 13   | 13     |
| Spring | min    | 0.02            | 1.11                            | 0.55             | 0.51              | 0.01 | 0.01             | 0.02           | 0.01             | 0.53 | 287.85 |
|        | median | 0.09            | 2.96                            | 1.30             | 0.71              | 0.06 | 0.02             | 0.04           | 0.01             | 0.72 | 293.77 |
|        | max    | 0.31            | 4.06                            | 1.57             | 1.03              | 0.23 | 0.02             | 0.07           | 0.05             | 0.83 | 297.78 |
|        | mean   | 0.11            | 2.84                            | 1.17             | 0.78              | 0.07 | 0.02             | 0.04           | 0.02             | 0.71 | 294.28 |
|        | SD     | 0.09            | 1.14                            | 0.39             | 0.20              | 0.07 | 0.00             | 0.02           | 0.01             | 0.08 | 2.98   |
|        | N      | 9               | 9                               | 9                | 9                 | 9    | 9                | 9              | 9                | 9    | 9      |
| Summer | min    | 0.02            | 2.14                            | 0.56             | 0.43              | 0.02 | 0.01             | 0.01           | 0.00             | 0.66 | 300.21 |
|        | median | 0.12            | 2.79                            | 1.03             | 0.62              | 0.03 | 0.08             | 0.04           | 0.03             | 0.77 | 301.05 |
|        | max    | 0.21            | 5.26                            | 1.59             | 0.85              | 0.10 | 0.13             | 0.05           | 0.05             | 0.85 | 303.66 |
|        | mean   | 0.11            | 3.09                            | 1.06             | 0.63              | 0.04 | 0.07             | 0.03           | 0.03             | 0.77 | 301.56 |
|        | SD     | 0.08            | 1.10                            | 0.44             | 0.15              | 0.03 | 0.05             | 0.01           | 0.02             | 0.07 | 1.24   |
|        | N      | 7               | 7                               | 7                | 7                 | 7    | 7                | 7              | 7                | 7    | 7      |
| Fall   | min    | 0.01            | 1.80                            | 0.61             | 0.36              | 0.02 | 0.01             | 0.01           | 0.00             | 0.43 | 287.82 |
|        | median | 0.04            | 2.32                            | 1.28             | 0.65              | 0.02 | 0.02             | 0.03           | 0.01             | 0.73 | 293.35 |
|        | max    | 0.20            | 5.52                            | 1.66             | 1.54              | 0.20 | 0.07             | 0.17           | 0.03             | 0.89 | 301.08 |
|        | mean   | 0.06            | 2.70                            | 1.16             | 0.74              | 0.04 | 0.03             | 0.04           | 0.01             | 0.69 | 294.71 |
|        | SD     | 0.06            | 1.11                            | 0.39             | 0.35              | 0.06 | 0.02             | 0.05           | 0.01             | 0.16 | 4.70   |
|        | N      | 10              | 10                              | 10               | 10                | 10   | 10               | 10             | 10               | 10   | 10     |

<sup>1</sup> All the concentration values are expressed in µg m<sup>-3</sup>.<sup>2</sup> TNH<sub>3</sub> = NH<sub>3</sub> + NH<sub>4</sub><sup>+</sup>; THNO<sub>3</sub> = HNO<sub>3</sub> + NO<sub>3</sub><sup>-</sup>; TH<sub>2</sub>SO<sub>4</sub> = SO<sub>4</sub><sup>2-</sup>; TNH<sub>3</sub>, THNO<sub>3</sub>, TH<sub>2</sub>SO<sub>4</sub> are all expressed as the equivalent concentration; T is temperature; RH is relative humidity; SD is standard deviation; N is the number of observations.**Table S10**The statistics of different precursor gases of iPM<sub>2.5</sub> by season at the OLF site in 2013-2016

| Season |        | Na <sup>+</sup> | TH <sub>2</sub> SO <sub>4</sub> | TNH <sub>3</sub> | THNO <sub>3</sub> | THCl | Ca <sup>2+</sup> | K <sup>+</sup> | Mg <sup>2+</sup> | RH   | T (K)  |
|--------|--------|-----------------|---------------------------------|------------------|-------------------|------|------------------|----------------|------------------|------|--------|
| Winter | min    | 0.00            | 0.22                            | 0.43             | 0.30              | 0.01 | 0.01             | 0.01           | 0.00             | 0.38 | 268.30 |
|        | median | 0.03            | 1.32                            | 0.88             | 0.77              | 0.03 | 0.02             | 0.05           | 0.00             | 0.66 | 282.15 |
|        | max    | 0.41            | 4.16                            | 2.52             | 1.96              | 0.48 | 0.04             | 0.15           | 0.05             | 0.96 | 295.25 |
|        | mean   | 0.07            | 1.50                            | 1.02             | 0.85              | 0.06 | 0.02             | 0.06           | 0.01             | 0.68 | 282.58 |
|        | SD     | 0.10            | 0.95                            | 0.57             | 0.47              | 0.10 | 0.01             | 0.04           | 0.01             | 0.15 | 5.77   |
|        | N      | 22              | 22                              | 22               | 22                | 22   | 22               | 22             | 22               | 22   | 22     |
| Spring | min    | 0.01            | 0.62                            | 0.70             | 0.54              | 0.01 | 0.01             | 0.01           | 0.00             | 0.47 | 282.67 |
|        | median | 0.06            | 1.52                            | 1.18             | 0.93              | 0.04 | 0.03             | 0.04           | 0.01             | 0.72 | 294.65 |
|        | max    | 0.27            | 4.46                            | 2.17             | 2.17              | 0.27 | 0.14             | 0.12           | 0.05             | 0.96 | 298.84 |
|        | mean   | 0.08            | 2.01                            | 1.24             | 1.01              | 0.06 | 0.03             | 0.05           | 0.01             | 0.70 | 293.68 |
|        | SD     | 0.08            | 1.05                            | 0.35             | 0.37              | 0.06 | 0.02             | 0.03           | 0.01             | 0.13 | 4.49   |
|        | N      | 23              | 23                              | 23               | 23                | 23   | 23               | 23             | 23               | 23   | 23     |
| Summer | min    | 0.02            | 0.86                            | 0.43             | 0.38              | 0.02 | 0.01             | 0.01           | 0.00             | 0.69 | 297.99 |
|        | median | 0.08            | 1.98                            | 1.04             | 0.79              | 0.04 | 0.04             | 0.03           | 0.01             | 0.80 | 300.78 |
|        | max    | 0.27            | 4.20                            | 1.78             | 2.31              | 0.16 | 0.12             | 0.11           | 0.05             | 0.87 | 302.99 |
|        | mean   | 0.09            | 2.14                            | 1.00             | 0.88              | 0.06 | 0.05             | 0.04           | 0.02             | 0.79 | 300.94 |
|        | SD     | 0.06            | 0.97                            | 0.36             | 0.40              | 0.04 | 0.03             | 0.02           | 0.01             | 0.05 | 1.18   |
|        | N      | 28              | 28                              | 28               | 28                | 28   | 28               | 28             | 28               | 28   | 28     |
| Fall   | min    | 0.00            | 0.33                            | 0.40             | 0.16              | 0.01 | 0.01             | 0.00           | 0.00             | 0.44 | 281.68 |
|        | median | 0.05            | 1.30                            | 0.79             | 0.51              | 0.02 | 0.02             | 0.04           | 0.01             | 0.73 | 295.37 |
|        | max    | 0.37            | 4.27                            | 1.54             | 1.46              | 0.48 | 0.05             | 0.10           | 0.04             | 0.88 | 300.49 |
|        | mean   | 0.07            | 1.43                            | 0.81             | 0.59              | 0.05 | 0.03             | 0.04           | 0.01             | 0.71 | 293.28 |
|        | SD     | 0.08            | 0.86                            | 0.30             | 0.34              | 0.10 | 0.01             | 0.03           | 0.01             | 0.13 | 5.69   |
|        | N      | 23              | 23                              | 23               | 23                | 23   | 23               | 23             | 23               | 23   | 23     |

<sup>1</sup> All the concentration values are expressed in µg m<sup>-3</sup>.<sup>2</sup> TNH<sub>3</sub> = NH<sub>3</sub> + NH<sub>4</sub><sup>+</sup>; THNO<sub>3</sub> = HNO<sub>3</sub> + NO<sub>3</sub><sup>-</sup>; TH<sub>2</sub>SO<sub>4</sub> = SO<sub>4</sub><sup>2-</sup>; TNH<sub>3</sub>, THNO<sub>3</sub>, TH<sub>2</sub>SO<sub>4</sub> are all expressed as the equivalent concentration; T is temperature; RH is relative humidity; SD is standard deviation; N is the number of observations.

**Table S11**

The summary of aerosol pH at five sites in 2012 to 2016

| Site | Winter      | Summer      |
|------|-------------|-------------|
| YRK  | 2.35 ± 0.53 | 1.73 ± 0.32 |
| JST  | 3.49 ± 0.72 | 2.38 ± 0.18 |
| CTR  | 2.40 ± 0.73 | 2.45 ± 0.15 |
| BHM  | 3.17 ± 0.41 | 2.47 ± 0.17 |
| OLF  | 2.96 ± 0.40 | 2.56 ± 0.12 |

**Table S12**

The summary of final MLR model coefficients at the JST site from 2010 to 2011

| Predictors                               | Coefficients | SE   | t value | Pr >  t                |
|------------------------------------------|--------------|------|---------|------------------------|
| Intercept ( $\beta_0$ )                  | 0.08         | 0.04 | 1.97    | 0.054                  |
| $\text{SO}_4^{2-}$ ( $\beta_1$ )         | 0.31         | 0.01 | 32.79   | $< 2 \times 10^{-16}$  |
| $\text{NO}_3^-$ ( $\beta_2$ )            | 0.25         | 0.03 | 7.91    | $5.57 \times 10^{-11}$ |
| $(\text{NO}_3^- - 0.66)^2$ ( $\beta_3$ ) | 0.02         | 0.01 | 3.43    | 0.001                  |
| $\text{Mg}^{2+}$ ( $\beta_4$ )           | -6.69        | 2.95 | -2.27   | 0.026                  |

<sup>1</sup>Residual standard error: 0.1104 on 62 degrees of freedom. Multiple R-squared: 0.96. Adjusted R-squared: 0.96. F-statistic: 397.4 on 4 and 62 D F, p-value:  $< 2.2 \times 10^{-16}$ .

**Table S13**

The summary of final MLR model coefficients at the JST site from 2012 to 2016

| Predictors                                  | Coefficients | SE     | t value | Pr >  t               |
|---------------------------------------------|--------------|--------|---------|-----------------------|
| Intercept ( $\beta_0$ )                     | 0.1967       | 0.041  | 4.78    | $5.64 \times 10^{-6}$ |
| $\text{SO}_4^{2-}$ ( $\beta_1$ )            | 0.35         | 0.0074 | 46.74   | $< 2 \times 10^{-16}$ |
| $\text{NO}_3^-$ ( $\beta_2$ )               | 0.0052       | 0.0286 | 0.18    | 0.86                  |
| $(\text{NO}_3^- - 0.45)^2$ ( $\beta_3$ )    | 0.11         | 0.01   | 10.57   | $< 2 \times 10^{-16}$ |
| T ( $\beta_4$ )                             | -0.013       | 0.0021 | -6.08   | $1.88 \times 10^{-8}$ |
| $\text{Mg}^{2+}$ ( $\beta_5$ )              | -1.15        | 1.68   | -0.69   | 0.49                  |
| $(\text{Mg}^{2+} - 0.0077)^2$ ( $\beta_6$ ) | -292.8       | 161.7  | -1.81   | 0.07                  |
| $\text{NH}_3$ ( $\beta_7$ )                 | -0.06        | 0.027  | -2.22   | 0.03                  |
| $(\text{NH}_3 - 1.31)^2$ ( $\beta_8$ )      | -0.0297      | 0.014  | -2.16   | 0.03                  |
| T: $\text{NH}_3$ ( $\beta_9$ )              | 0.0055       | 0.0013 | 4.20    | $5.53 \times 10^{-5}$ |

<sup>1</sup>Residual standard error: 0.05489 on 107 degrees of freedom. Multiple R-squared: 0.97. Adjusted R-squared: 0.97. F-statistic: 462 on 9 and 107 DF, p-value:  $< 2.2 \times 10^{-16}$ .

**Table S14**

The summary of final MLR model coefficients at the BHM site in 2011

| Predictors                                 | Coefficients | SE       | t value | Pr >  t                |
|--------------------------------------------|--------------|----------|---------|------------------------|
| Intercept ( $\beta_0$ )                    | -0.0182      | 0.083    | -0.219  | 0.83                   |
| $\text{SO}_4^{2-}$ ( $\beta_1$ )           | 0.316        | 0.0132   | 23.95   | $5.86 \times 10^{-14}$ |
| $\text{NO}_3^-$ ( $\beta_2$ )              | 0.489        | 0.0659   | 7.42    | $1.46 \times 10^{-6}$  |
| $(\text{T} - 18.23)^2$ ( $\beta_3$ )       | 0.00052      | 0.000196 | 2.64    | 0.018                  |
| $(\text{Mg}^{2+} - 0.014)^2$ ( $\beta_4$ ) | -568.8       | 272.6    | -2.09   | 0.053                  |
| $(\text{NO}_3^- - 0.68)^2$ ( $\beta_5$ )   | -0.058       | 0.027    | -2.15   | 0.047                  |
| $\text{Ca}^{2+}$ ( $\beta_6$ )             | 3.85         | 0.904    | -4.26   | $5.96 \times 10^{-4}$  |
| $\text{NH}_3$ ( $\beta_7$ )                | 0.067        | 0.0345   | 1.95    | 0.07                   |
| $(\text{NH}_3 - 1.63)^2$ ( $\beta_8$ )     | -0.063       | 0.0235   | -2.69   | 0.016                  |
| $(\text{Ca}^{2+} - 0.052)^2$ ( $\beta_9$ ) | 37.05        | 8.998    | 4.12    | 0.00081                |
| $(\text{HNO}_3 - 1.23)^2$ ( $\beta_{10}$ ) | 0.110        | 0.041    | 2.60    | 0.019                  |
| $(\text{Cl}^- - 0.16)^2$ ( $\beta_{11}$ )  | 0.287        | 0.766    | 0.374   | 0.71                   |
| T ( $\beta_{12}$ )                         | -0.00353     | 0.00484  | -0.729  | 0.48                   |
| $\text{Mg}^{2+}$ ( $\beta_{13}$ )          | -0.0106      | 2.55     | -0.004  | 0.997                  |
| $\text{HNO}_3$ ( $\beta_{14}$ )            | -0.0108      | 0.0458   | -0.235  | 0.82                   |
| $\text{Cl}^-$ ( $\beta_{15}$ )             | 0.18         | 0.249    | 0.721   | 0.48                   |

<sup>1</sup>Residual standard error: 0.05312 on 16 degrees of freedom. Multiple R-squared: 0.99. Adjusted R-squared: 0.98. F-statistic: 126.5 on 15 and 16 DF, p-value:  $1.008 \times 10^{-13}$ .

**Table S15**

The summary of final MLR model coefficients at the BHM site from 2012 to 2016

| Predictors                                | Coefficients | SE    | t value | Pr >  t               |
|-------------------------------------------|--------------|-------|---------|-----------------------|
| Intercept ( $\beta_0$ )                   | 0.248        | 0.044 | 5.68    | $4.22 \times 10^{-7}$ |
| $\text{SO}_4^{2-}$ ( $\beta_1$ )          | 0.292        | 0.024 | 12.09   | $< 2 \times 10^{-16}$ |
| T ( $\beta_2$ )                           | -0.012       | 0.002 | -6.17   | $6.28 \times 10^{-8}$ |
| $(\text{NO}_3^- - 0.34)^2$ ( $\beta_3$ )  | 0.081        | 0.013 | 6.12    | $7.81 \times 10^{-8}$ |
| $(\text{Cl}^- - 0.102)^2$ ( $\beta_4$ )   | 0.518        | 0.294 | 1.76    | 0.0833                |
| $\text{Ca}^{2+}$ ( $\beta_5$ )            | -0.537       | 0.194 | -2.77   | 0.0075                |
| $\text{NO}_3^-$ ( $\beta_6$ )             | 0.043        | 0.047 | 0.914   | 0.3642                |
| $\text{Cl}^-$ ( $\beta_7$ )               | 0.037        | 0.124 | 0.301   | 0.7645                |
| $\text{SO}_4^{2-}:\text{T}$ ( $\beta_8$ ) | 0.0023       | 0.001 | 2.43    | 0.0181                |

<sup>1</sup>Residual standard error: 0.04904 on 60 degrees of freedom. Multiple R-squared: 0.99. Adjusted R-squared: 0.99. F-statistic: 641.6 on 8 and 60 D F, p-value:  $< 2.2 \times 10^{-16}$ .

**Table S16**

The summary of final MLR model coefficients at the CTR site from 2012 to 2016

| Predictors                                  | Coefficients | SE     | t value | Pr >  t               |
|---------------------------------------------|--------------|--------|---------|-----------------------|
| Intercept ( $\beta_0$ )                     | 0.0049       | 0.012  | 0.403   | 0.687                 |
| $\text{SO}_4^{2-}$ ( $\beta_1$ )            | 0.32         | 0.0057 | 55.84   | $< 2 \times 10^{-16}$ |
| $\text{NO}_3^-$ ( $\beta_2$ )               | 0.21         | 0.017  | 12.21   | $< 2 \times 10^{-16}$ |
| $\text{Mg}^{2+}$ ( $\beta_3$ )              | -6.63        | 0.54   | -12.26  | $< 2 \times 10^{-16}$ |
| $\text{NH}_3$ ( $\beta_4$ )                 | 0.14         | 0.028  | 5.12    | $8.31 \times 10^{-7}$ |
| $(\text{SO}_4^{2-} - 1.59)^2$ ( $\beta_5$ ) | -0.0169      | 0.0039 | -4.36   | $2.24 \times 10^{-5}$ |

<sup>1</sup>Residual standard error: 0.05129 on 168 degrees of freedom. Multiple R-squared: 0.96. Adjusted R-squared: 0.96. F-statistic: 921.2 on 5 and 168 DF, p-value:  $< 2.2 \times 10^{-16}$ .

**Table S17**

The summary of final MLR model coefficients at the OAK site in 2010

| Predictors                                  | Coefficients | SE      | t value | Pr >  t               |
|---------------------------------------------|--------------|---------|---------|-----------------------|
| Intercept ( $\beta_0$ )                     | 0.103        | 0.054   | 1.89    | 0.068                 |
| $\text{SO}_4^{2-}$ ( $\beta_1$ )            | 0.36         | 0.014   | 26.28   | $< 2 \times 10^{-16}$ |
| T ( $\beta_2$ )                             | -0.0092      | 0.002   | -4.45   | 0.0001                |
| $\text{Mg}^{2+}$ ( $\beta_3$ )              | -5.41        | 1.04    | -5.21   | $1.19 \times 10^{-5}$ |
| $(\text{SO}_4^{2-} - 2.47)^2$ ( $\beta_4$ ) | -0.02        | 0.0076  | -2.62   | 0.013                 |
| $\text{NH}_3$ ( $\beta_5$ )                 | 0.16         | 0.055   | 2.97    | 0.0056                |
| $\text{NO}_3^-$ ( $\beta_6$ )               | 0.19         | 0.054   | 3.52    | 0.0013                |
| $(\text{T} - 17.46)^2$ ( $\beta_7$ )        | -0.00028     | 0.00015 | -1.86   | 0.073                 |

<sup>1</sup>Residual standard error: 0.06706 on 31 degrees of freedom. Multiple R-squared: 0.97. Adjusted R-squared: 0.97. F-statistic: 165.5 on 7 and 31 D F, p-value:  $< 2.2 \times 10^{-16}$ .

**Table S18**

The summary of final MLR model coefficients at the OLF site from 2013 to 2016

| Predictors                                | Coefficients | SE     | t value | Pr >  t               |
|-------------------------------------------|--------------|--------|---------|-----------------------|
| Intercept ( $\beta_0$ )                   | -0.0013      | 0.024  | -0.054  | 0.96                  |
| $\text{SO}_4^{2-}$ ( $\beta_1$ )          | 0.33         | 0.0075 | 43.69   | $< 2 \times 10^{-16}$ |
| $\text{NO}_3^-$ ( $\beta_3$ )             | 0.35         | 0.061  | 5.74    | $1.36 \times 10^{-7}$ |
| $\text{Mg}^{2+}$ ( $\beta_2$ )            | -4.69        | 0.88   | -5.30   | $8.78 \times 10^{-7}$ |
| $(\text{Ca}^{2+} - 0.03)^2$ ( $\beta_4$ ) | -19.02       | 7.90   | -2.41   | 0.0181                |
| $(\text{NO}_3^- - 0.26)^2$ ( $\beta_5$ )  | -0.283       | 0.0899 | -3.16   | 0.0022                |
| $(\text{NH}_3 - 0.45)^2$ ( $\beta_6$ )    | 0.13         | 0.0819 | 1.59    | 0.1153                |
| $\text{Ca}^{2+}$ ( $\beta_7$ )            | -0.522       | 0.602  | -0.868  | 0.3879                |
| $\text{NH}_3$ ( $\beta_8$ )               | 0.0547       | 0.0425 | 1.288   | 0.2013                |

<sup>1</sup>Residual standard error: 0.0681 on 87 degrees of freedom. Multiple R-squared: 0.96. Adjusted R-squared: 0.96. F-statistic: 287.2 on 8 and 87 D F, p-value:  $< 2.2 \times 10^{-16}$ .

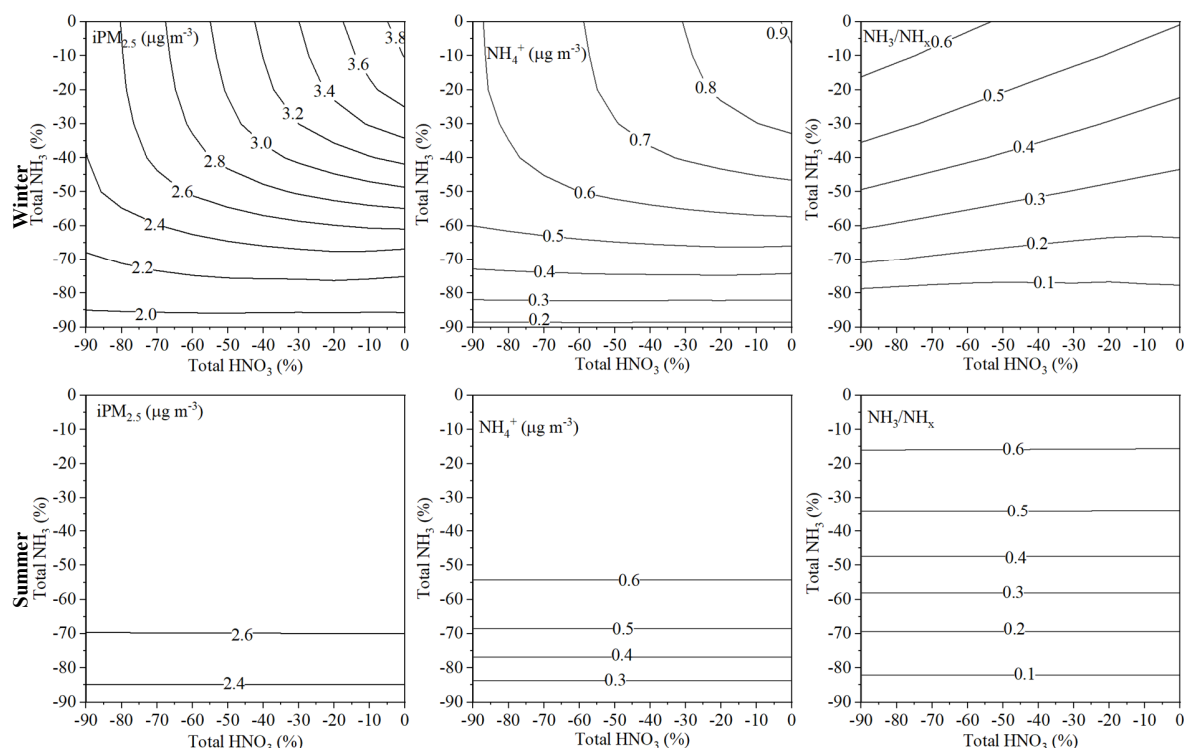

**Figure S1.** Responses of  $iPM_{2.5}$ ,  $NH_4^+$ , and  $NH_3/NH_x$  to the changes of  $TNH_3$  and  $THNO_3$  at the JST site in summer and winter of 2012-2016

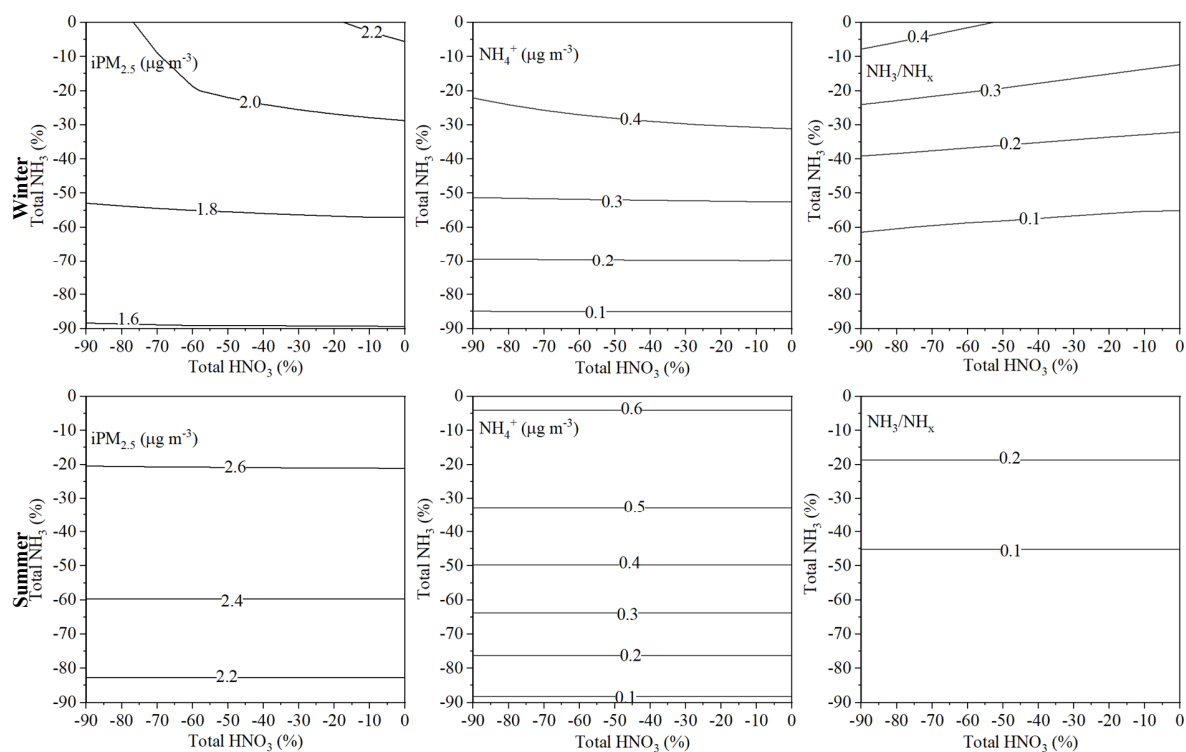

**Figure S2.** Responses of  $iPM_{2.5}$ ,  $NH_4^+$ , and  $NH_3/NH_x$  to the changes of  $TNH_3$  and  $THNO_3$  at the CTR site in summer and winter of 2012-2016

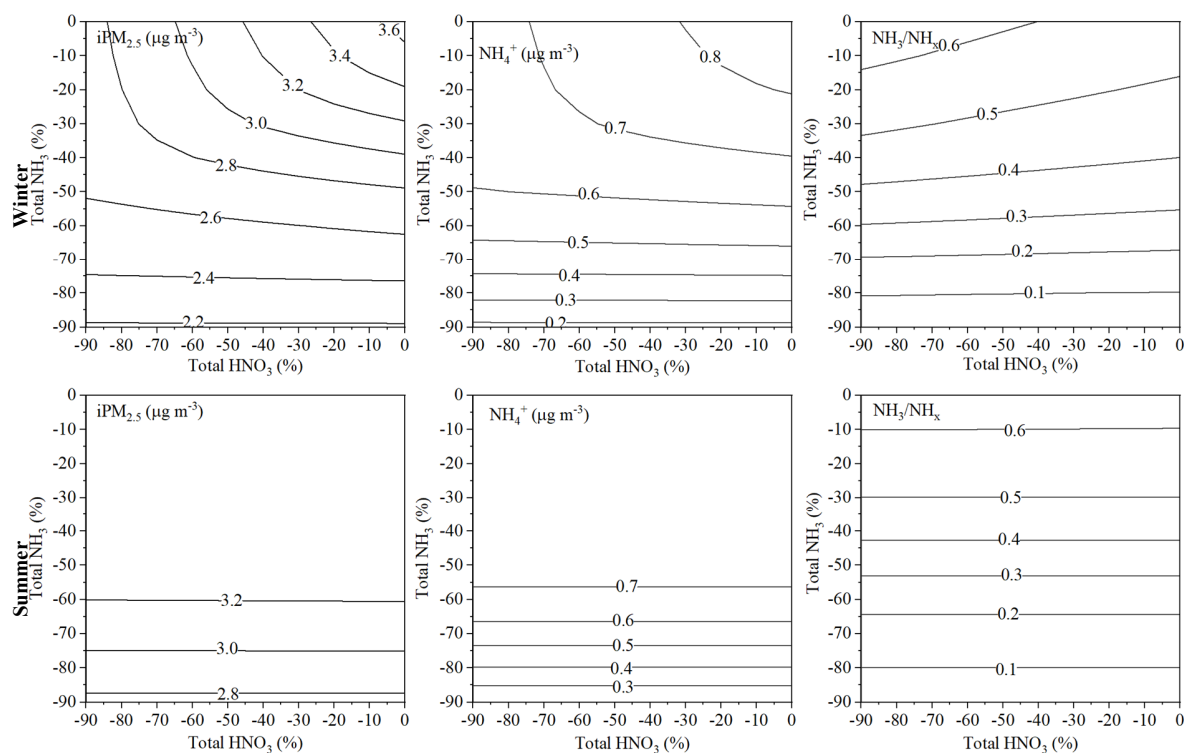

**Figure S3.** Responses of  $iPM_{2.5}$ ,  $NH_4^+$ , and  $NH_3/NH_x$  to the changes of  $TNH_3$  and  $THNO_3$  at the BHM site in summer and winter of 2012-2016

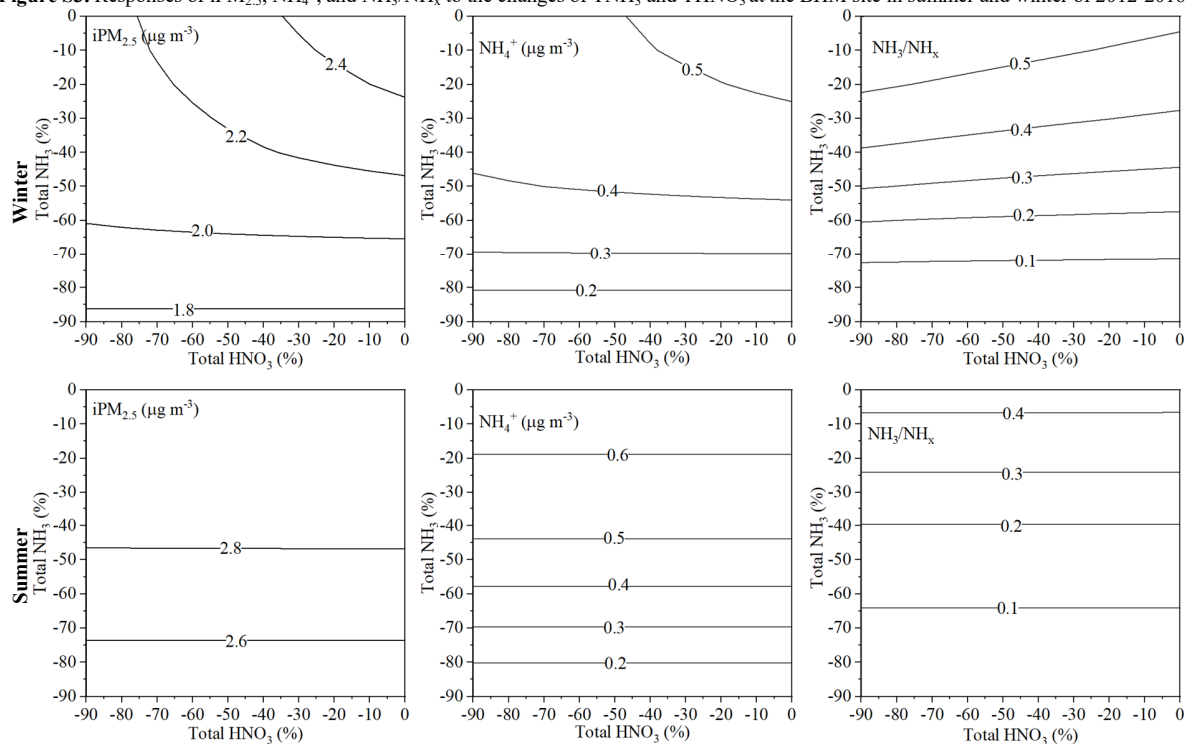

**Figure S4.** Responses of  $iPM_{2.5}$ ,  $NH_4^+$ , and  $NH_3/NH_x$  to the changes of  $TNH_3$  and  $THNO_3$  at the OLF site in summer and winter of 2013-2016

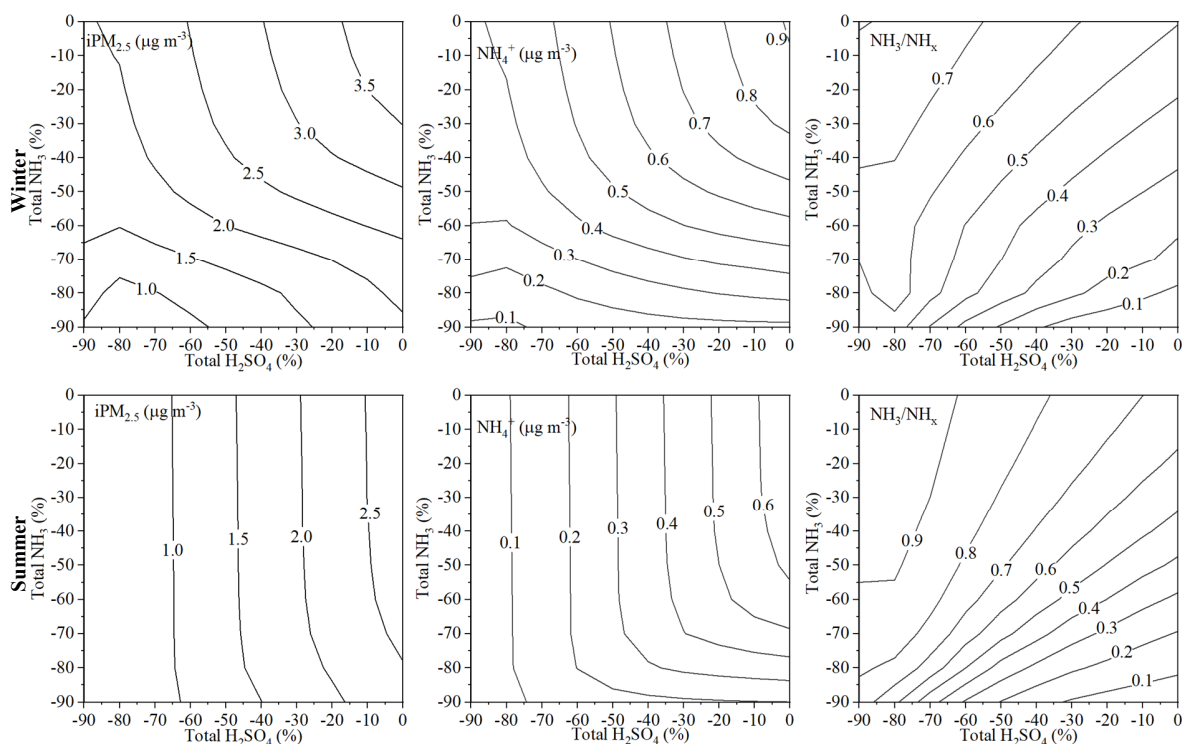

**Figure S5.** Responses of  $iPM_{2.5}$ ,  $NH_4^+$ , and  $NH_3/NH_x$  to the changes of Total  $NH_3$  and  $H_2SO_4$  at the JST site in summer and winter of 2012-2016

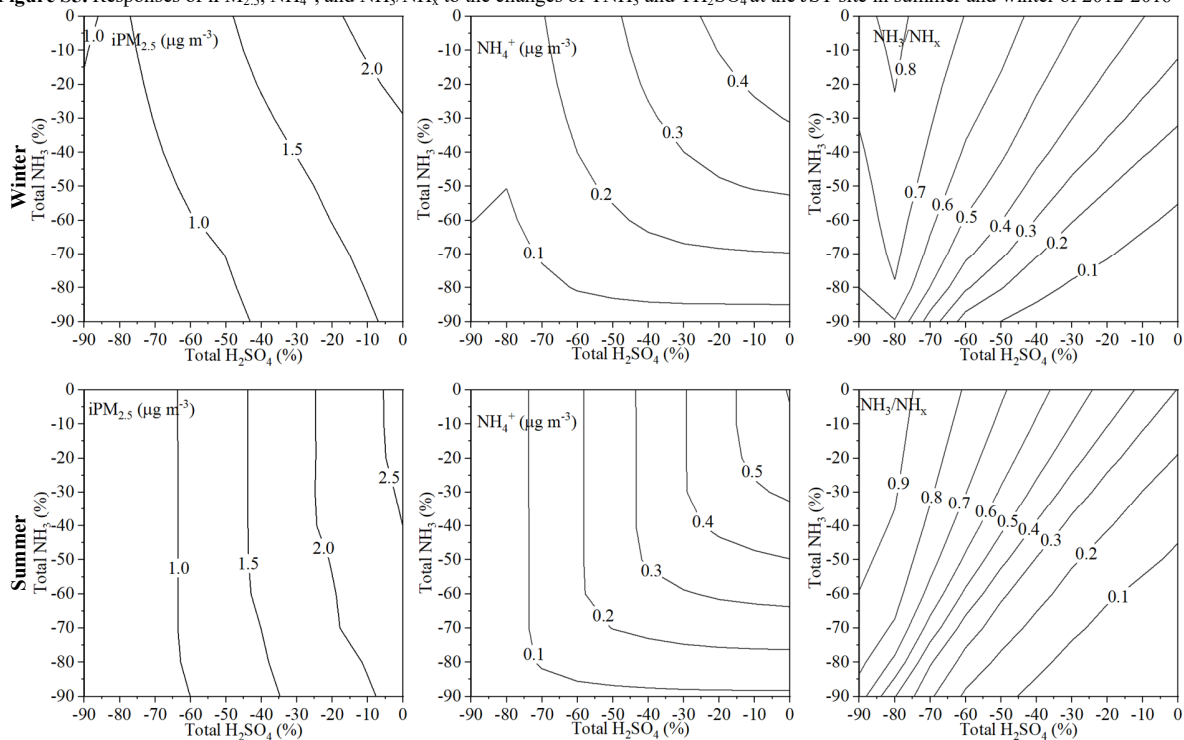

**Figure S6.** Responses of  $iPM_{2.5}$ ,  $NH_4^+$ , and  $NH_3/NH_x$  to the changes of Total  $NH_3$  and  $H_2SO_4$  at the CTR site in summer and winter of 2012-2016

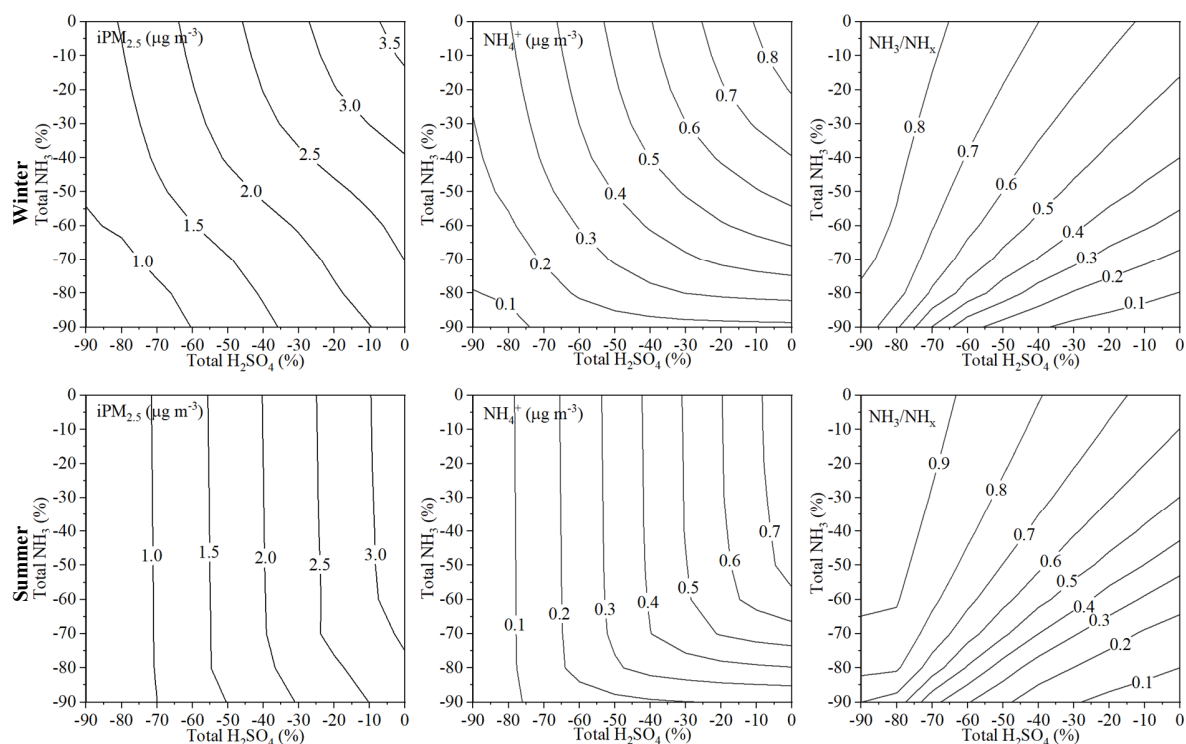

**Figure S7.** Responses of  $iPM_{2.5}$ ,  $NH_4^+$ , and  $NH_3/NH_x$  to the changes of Total  $NH_3$  and  $H_2SO_4$  at the BHM site in summer and winter of 2012-2016

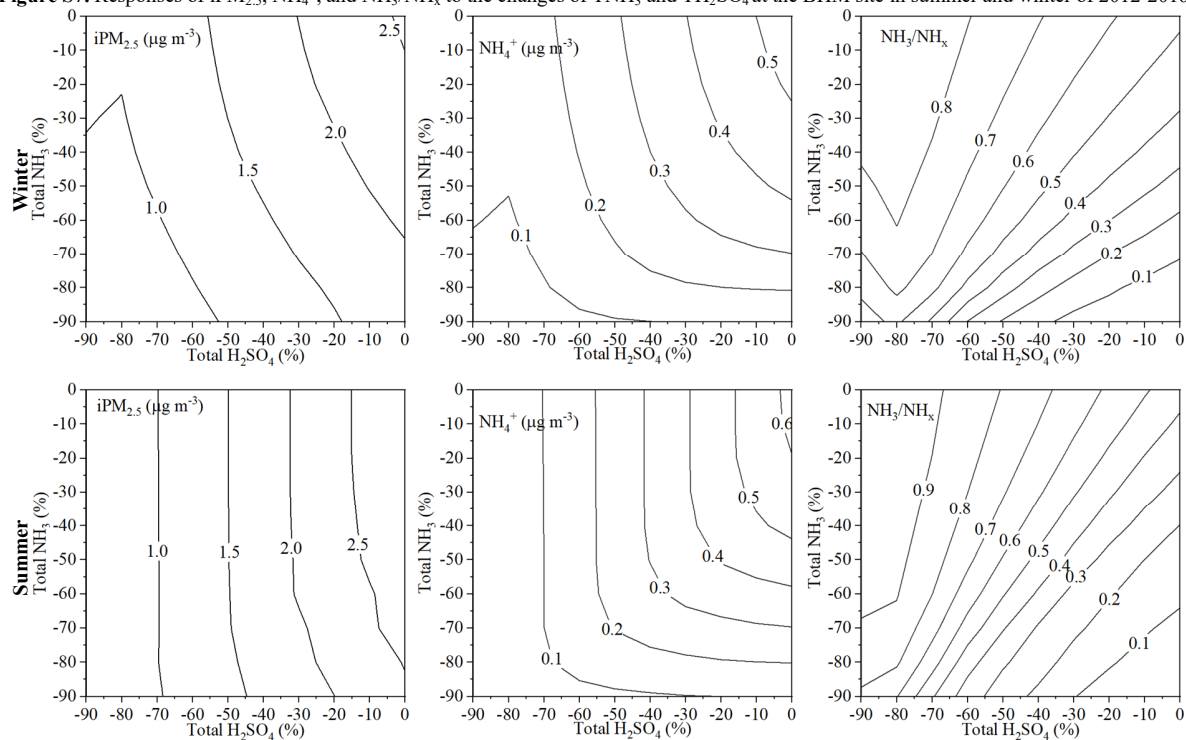

**Figure S8.** Responses of  $iPM_{2.5}$ ,  $NH_4^+$ , and  $NH_3/NH_x$  to the changes of Total  $NH_3$  and  $H_2SO_4$  at the OLF site in summer and winter of 2013-2016

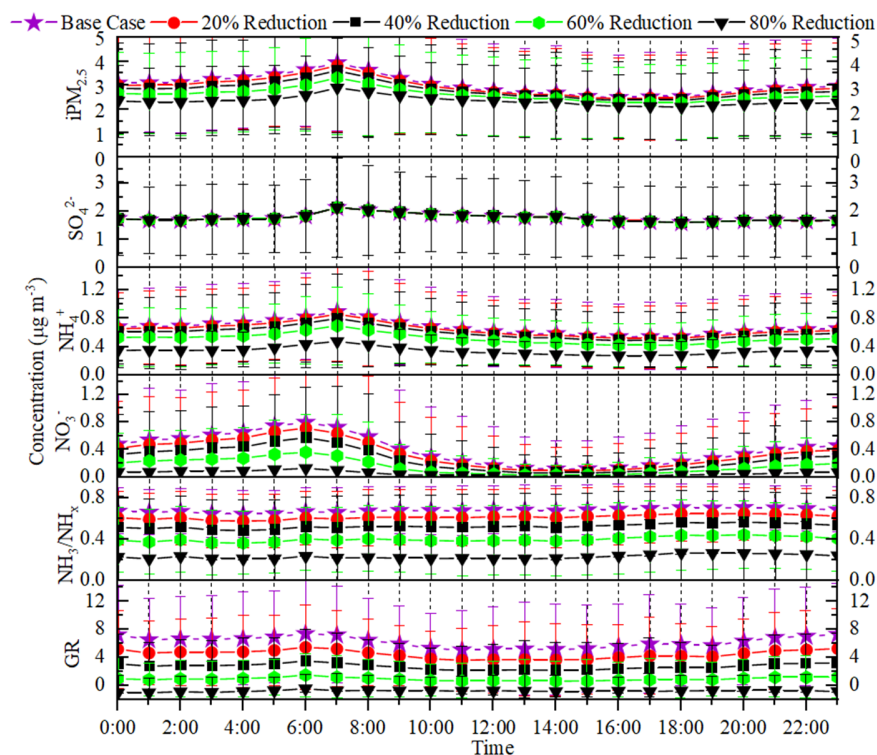

**Figure S9.** Responses of  $iPM_{2.5}$ ,  $SO_4^{2-}$ ,  $NH_4^+$ ,  $NO_3^-$ ,  $NH_3/NH_x$ , and GR to the reductions in  $TNH_3$  at the BHM site in 2012-2016

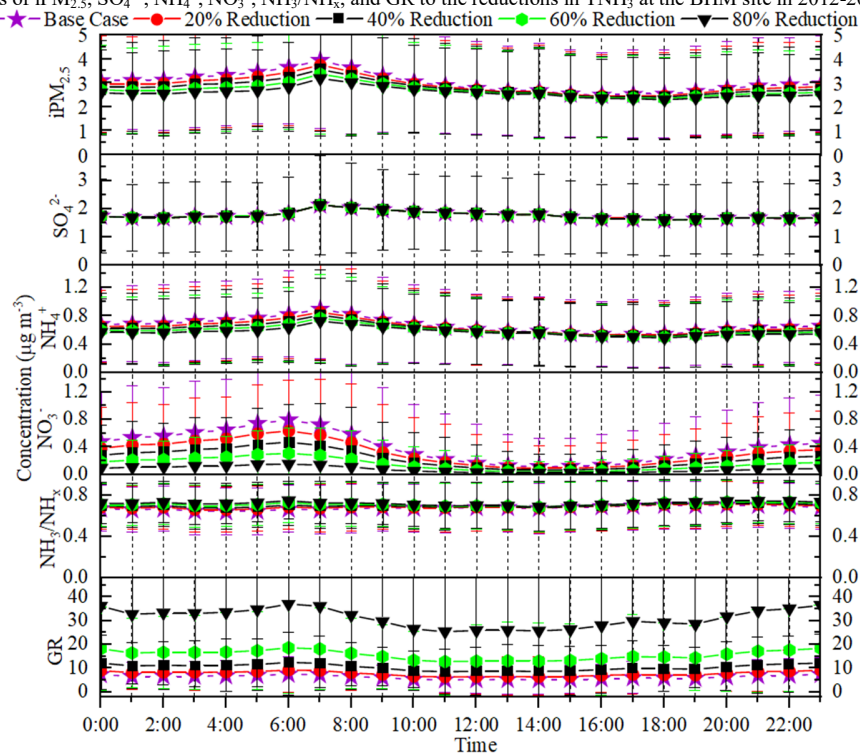

**Figure S10.** Responses of  $iPM_{2.5}$ ,  $SO_4^{2-}$ ,  $NH_4^+$ ,  $NO_3^-$ ,  $NH_3/NH_x$ , and GR to the reductions in  $THNO_3$  at the BHM site in 2012-2016



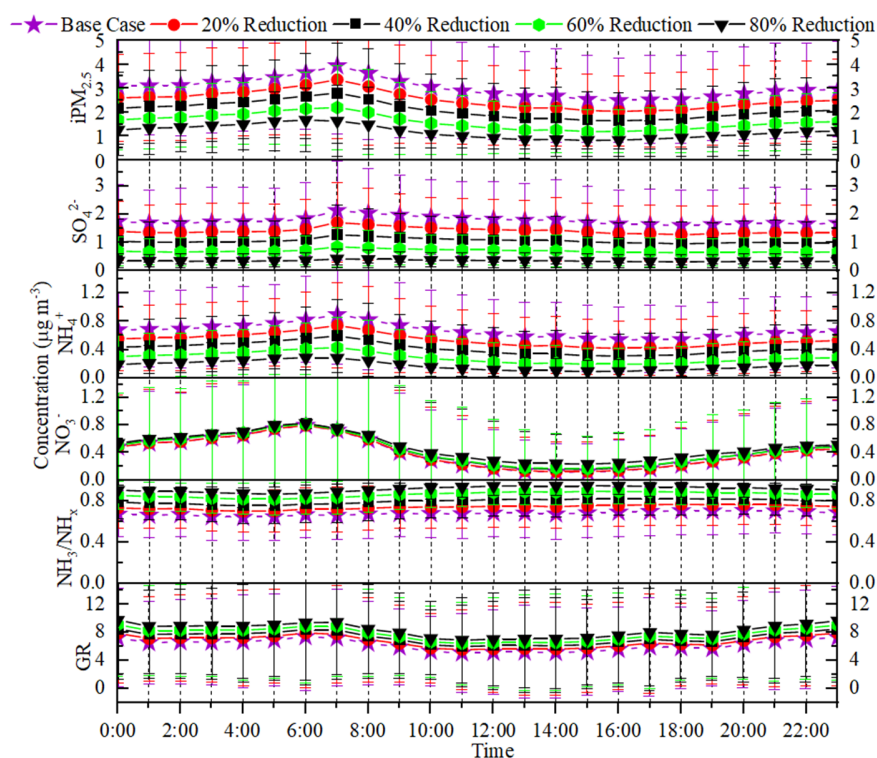

**Figure S11.** Responses of  $iPM_{2.5}$ ,  $SO_4^{2-}$ ,  $NH_4^+$ ,  $NO_3^-$ ,  $NH_3/NH_x$ , and GR to the reductions in  $TH_2SO_4$  at the BHM site in 2012-2016

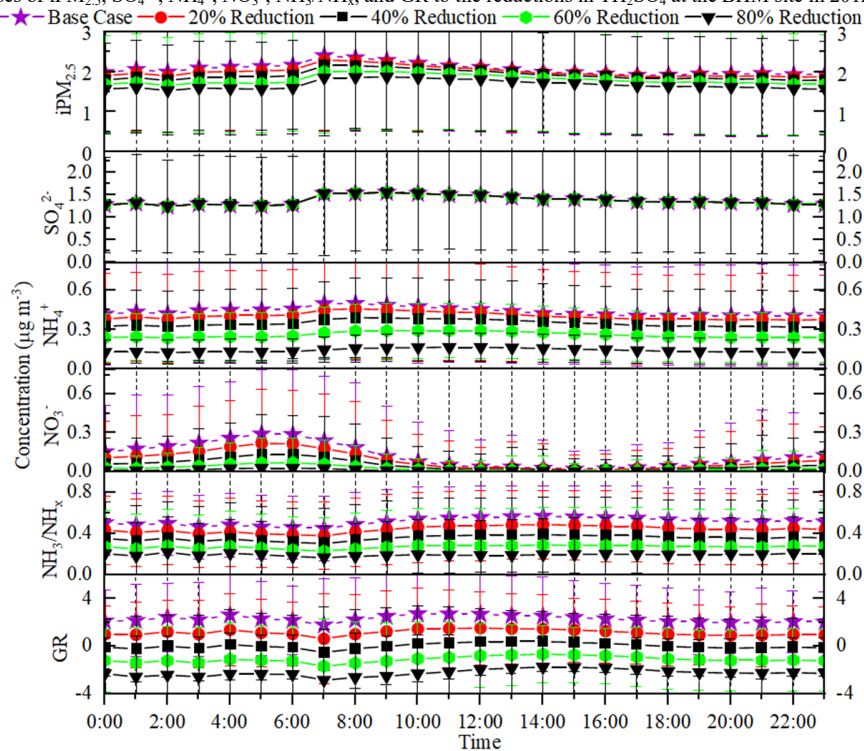

**Figure S12.** Responses of  $iPM_{2.5}$ ,  $SO_4^{2-}$ ,  $NH_4^+$ ,  $NO_3^-$ ,  $NH_3/NH_x$ , and GR to the reductions in  $TNH_3$  at the CTR site in 2012-2016

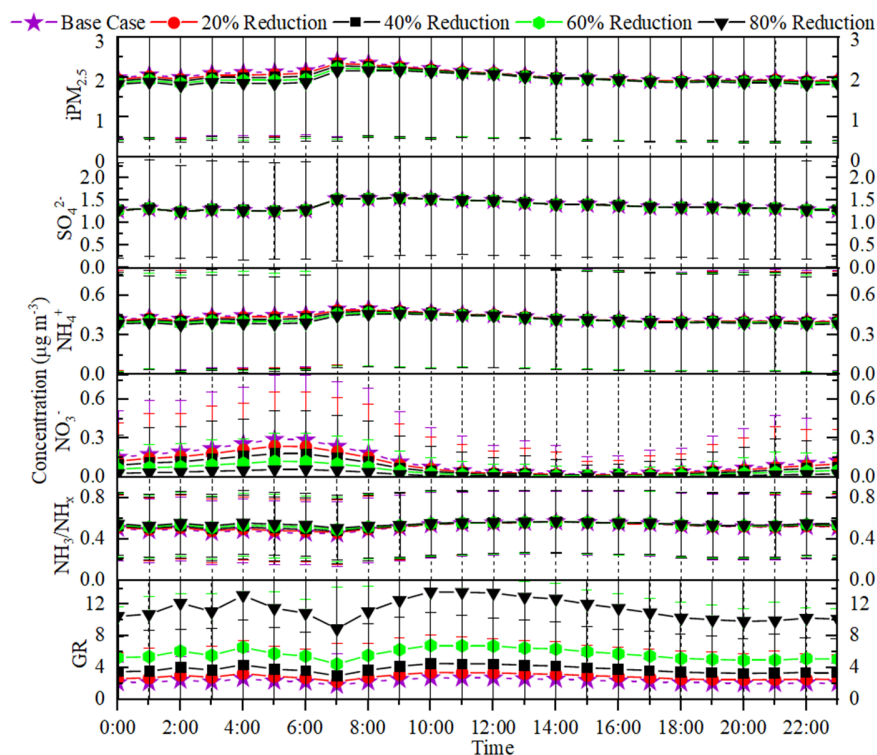

**Figure S13.** Responses of  $iPM_{2.5}$ ,  $SO_4^{2-}$ ,  $NH_4^+$ ,  $NO_3^-$ ,  $NH_3/NH_x$ , and GR to the reductions in  $THNO_3$  at the CTR site in 2012-2016

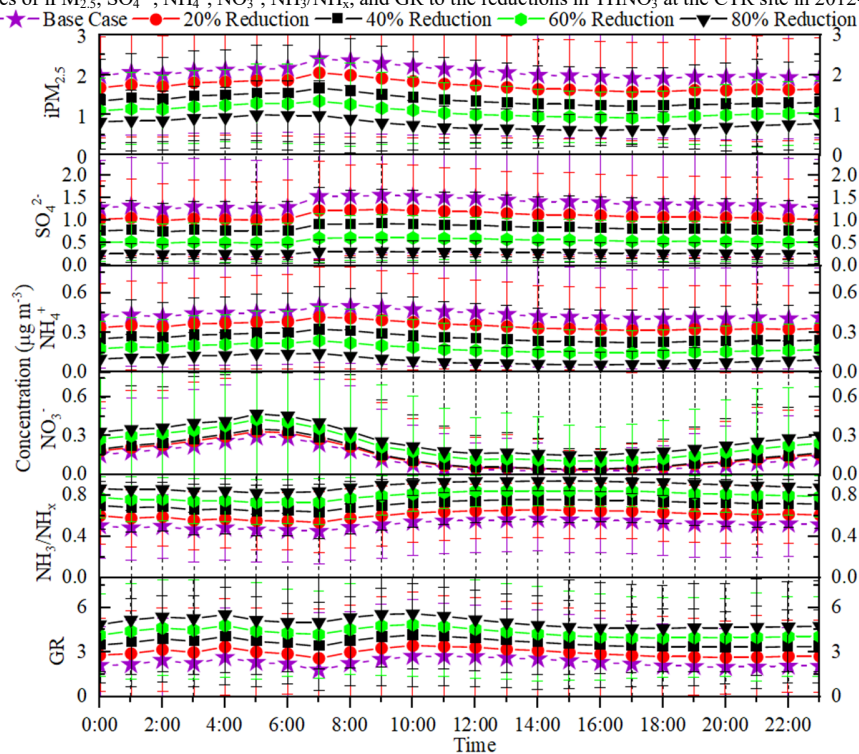

**Figure S14.** Responses of  $iPM_{2.5}$ ,  $SO_4^{2-}$ ,  $NH_4^+$ ,  $NO_3^-$ ,  $NH_3/NH_x$ , and GR to the reductions in  $TH_2SO_4$  at the CTR site in 2012-2016

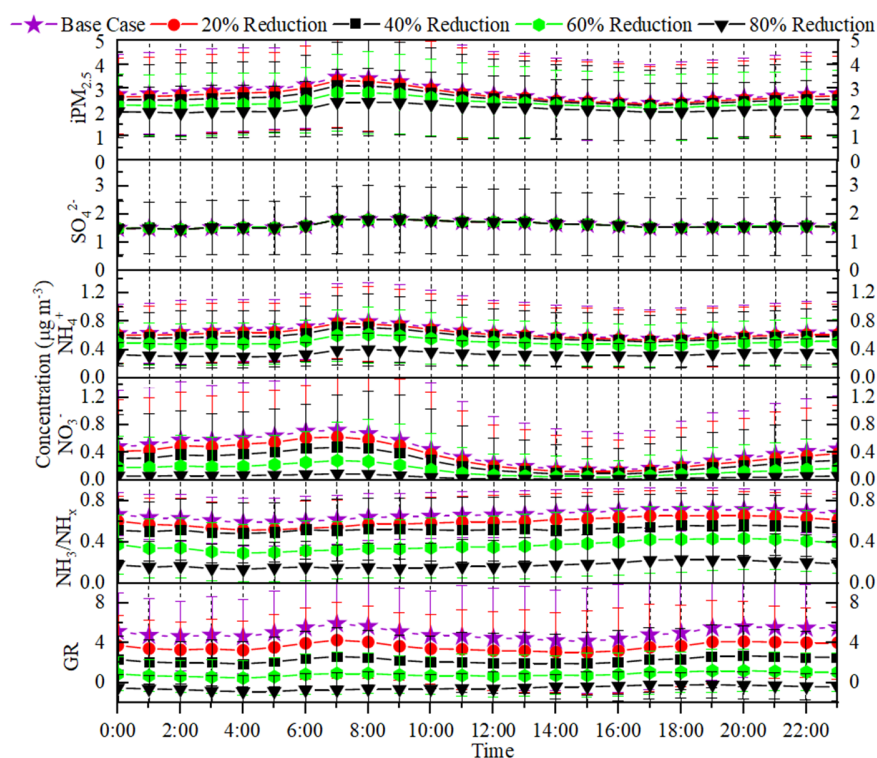

**Figure S15.** Responses of  $iPM_{2.5}$ ,  $SO_4^{2-}$ ,  $NH_4^+$ ,  $NO_3^-$ ,  $NH_3/NH_x$ , and GR to the reductions in  $TNH_3$  at the JST site in 2012-2016

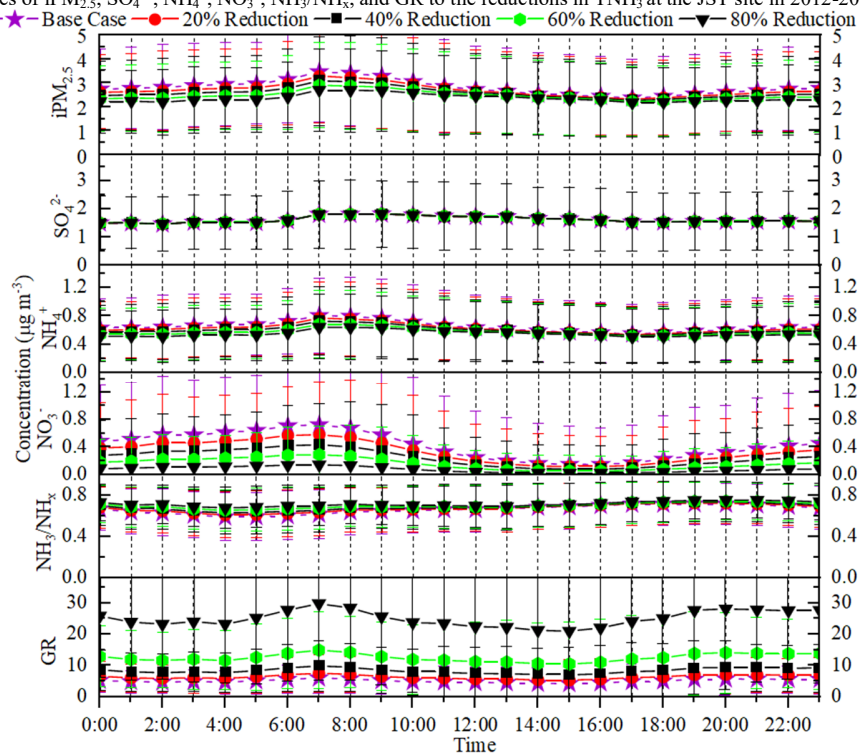

**Figure S16.** Responses of  $iPM_{2.5}$ ,  $SO_4^{2-}$ ,  $NH_4^+$ ,  $NO_3^-$ ,  $NH_3/NH_x$ , and GR to the reductions in  $THNO_3$  at the JST site in 2012-2016

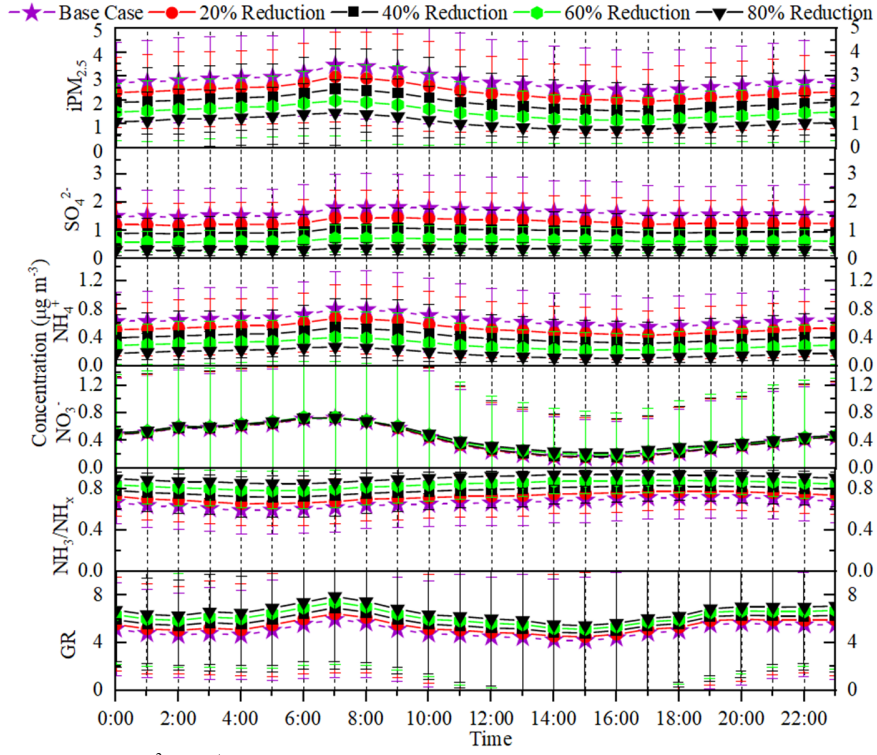

**Figure S17.** Responses of  $iPM_{2.5}$ ,  $SO_4^{2-}$ ,  $NH_4^+$ ,  $NO_3^-$ ,  $NH_3/NH_x$ , and GR to the reductions in  $TH_2SO_4$  at the JST site in 2012-2016

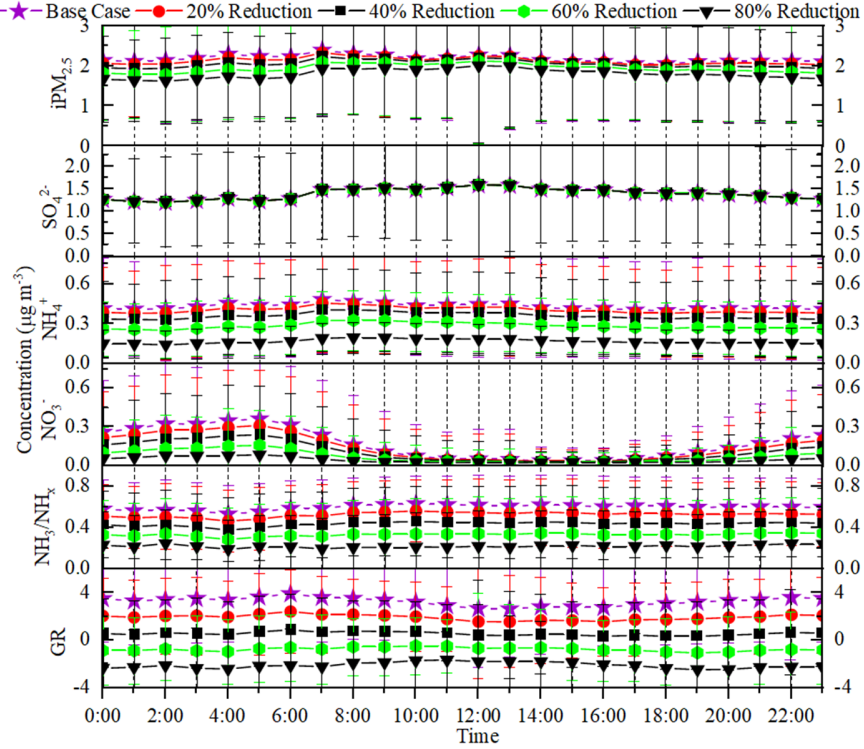

**Figure S18.** Responses of  $iPM_{2.5}$ ,  $SO_4^{2-}$ ,  $NH_4^+$ ,  $NO_3^-$ ,  $NH_3/NH_x$ , and GR to the reductions in  $TNH_3$  at the OLF site in 2013-2016



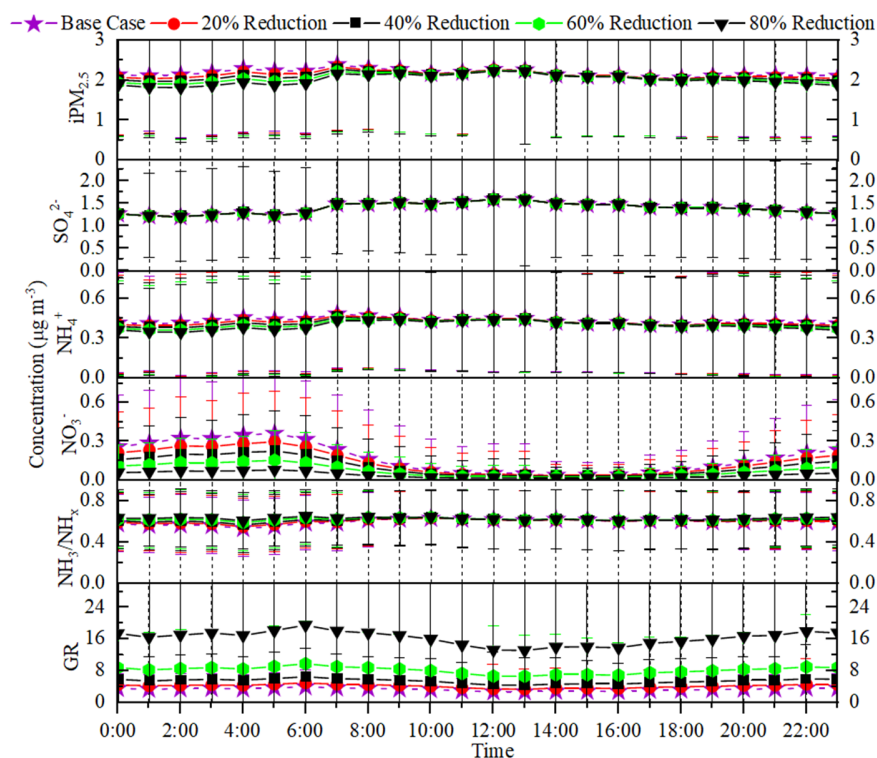

**Figure S19.** Responses of  $iPM_{2.5}$ ,  $SO_4^{2-}$ ,  $NH_4^+$ ,  $NO_3^-$ ,  $NH_3/NH_x$ , and GR to the reductions in  $THNO_3$  at the OLF site in 2013-2016

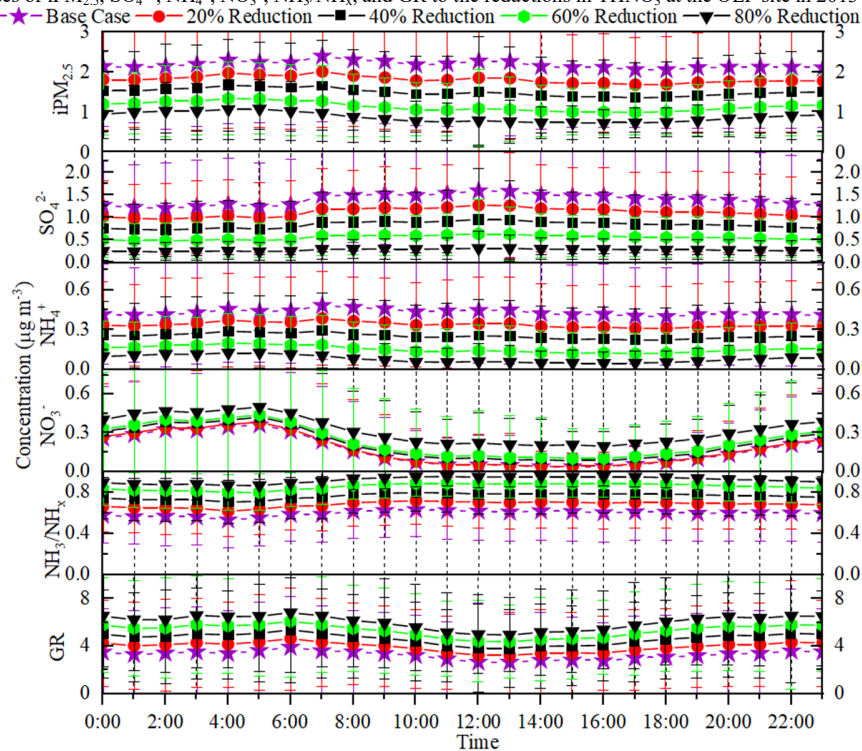

**Figure S20.** Responses of  $iPM_{2.5}$ ,  $SO_4^{2-}$ ,  $NH_4^+$ ,  $NO_3^-$ ,  $NH_3/NH_x$ , and GR to the reductions in  $TH_2SO_4$  at the OLF site in 2013-2016
